# Supplementary material for: The Drosophila RNA Helicase Belle (DDX3) Non-Autonomously Suppresses Germline Tumorigenesis Via Regulation of a Specific mRNA Set
Source: MDPI journal article supplement (doi:10.3390/cells9030550), 2020-02-26

| #clustering method | cluster number | cluster color | gene count |
|--------------------|----------------|---------------|------------|
| MCL                | 1              | Red           | 4          |
| MCL                | 1              | Red           | 4          |
| MCL                | 1              | Red           | 4          |
| MCL                | 1              | Red           | 4          |
| MCL                | 3              | Green         | 4          |
| MCL                | 3              | Green         | 4          |
| MCL                | 3              | Green         | 4          |
| MCL                | 3              | Green         | 4          |
| MCL                | 2              | Yellow        | 4          |
| MCL                | 2              | Yellow        | 4          |
| MCL                | 2              | Yellow        | 4          |
| MCL                | 2              | Yellow        | 4          |
| MCL                | 4              | Cyan          | 3          |
| MCL                | 4              | Cyan          | 3          |
| MCL                | 4              | Cyan          | 3          |
| MCL                | 5              | Blue          | 2          |
| MCL                | 5              | Blue          | 2          |

| protein name | protein identifier | protein description                                 |  |  |
|--------------|--------------------|-----------------------------------------------------|--|--|
| hyd          | 7227.FBpp0081568   | E3 ubiquitin-protein ligase hyd; E3 ubiquitin-pro   |  |  |
| ctrip        | 7227.FBpp0292914   | Circadian trip (Ctrip) is a HECT ubiquitin ligase t |  |  |
| Uba1         | 7227.FBpp0087583   | ATP binding; ubiquitin activating enzyme activity   |  |  |
| Taf1         | 7227.FBpp0293442   | Transcription initiation factor TFIID subunit 1; TF |  |  |
| Rpn7         | 7227.FBpp0083687   | 26S proteasome non-ATPase regulatory subunit        |  |  |
| TER94        | 7227.FBpp0111818   | Transitional endoplasmic reticulum ATPase TER       |  |  |
| Cul1         | 7227.FBpp0087921   | Cullin homolog 1; Core component of multiple S      |  |  |
| Fs(2)Ket     | 7227.FBpp0294035   | Importin subunit beta; Required for nuclear prote   |  |  |
| garz         | 7227.FBpp0087010   | Gartenzweg, isoform B; Gartenzweg (Garz) is a       |  |  |
| beta'COP     | 7227.FBpp0080048   | Coatomer subunit beta; The coatomer is a cytos      |  |  |
| Not1         | 7227.FBpp0293496   | Not1, isoform C; Protein binding. It is involved in |  |  |
| Arf102F      | 7227.FBpp0088256   | ADP-ribosylation factor 2; GTP-binding protein ir   |  |  |
| Rho1         | 7227.FBpp0086354   | Ras-like GTP-binding protein Rho1; Has a role in    |  |  |
| dia          | 7227.FBpp0297103   | Protein diaphanous; Required for cytokinesis in l   |  |  |
| pbl          | 7227.FBpp0076487   | Pebble, isoform B; Semaphorin receptor binding      |  |  |
| Cpsf160      | 7227.FBpp0089163   | Cleavage and polyadenylation specificity factor s   |  |  |
| Hrb98DE      | 7227.FBpp0084669   | Heterogeneous nuclear ribonucleoprotein at 98D      |  |  |

|  |  |  |  |
|--|--|--|--|
|  |  |  |  |
|--|--|--|--|

ubiquitin ligase which accepts ubiquitin from an E2 ubiquitin-conjugating enzyme in the form of a thioesterate. It regulates the levels and circadian oscillations of the Clk transcriptional activator. Ctr1 is involved in the biological process described with: cell proliferation; neuron remodeling. 191D is a multimeric protein complex that plays a central role in mediating promoter repression. 191D6; Acts as a regulatory subunit of the 26S proteasome which is involved in the ATP-dependent degradation of ubiquitinated substrates. 191D94; Necessary for the fragmentation of Golgi stacks during mitosis and for their reassembly. 191D94; Component of the SCF (SKP1-CUL1-F-box protein) E3 ubiquitin-protein ligase complexes which mediate the ubiquitination and degradation of substrates. It is involved in import and mediates docking of import substrate to distinct nucleoporins. In Drosophila, 191D94 is a guanine nucleotide exchange factor localized to the cis-Golgi apparatus. Garz1 plays roles in the regulation of the Golgi apparatus. 191D94 is a catabolic protein complex that binds to dilysine motifs and reversibly associates with Golgi network. 191D94 is involved in the biological process described with: mRNA catabolic process; muscle organ development; Golgi apparatus organization; involved in protein trafficking; may modulate vesicle budding and uncoating within the Golgi apparatus. 191D94 is involved in regulating actin cytoskeletal organization: required during early development for proper organization of the actin cytoskeleton in both mitosis and meiosis. Has a role in actin cytoskeleton organization and is essential for cell division. 191D94; GTPase activator activity; guanyl-nucleotide exchange factor activity; Rho GTPase binding activity. 191D94; subunit 1; Component of the cleavage and polyadenylation specificity factor (CPSF) complex. 191D94; 191D94 (Hrb98DE) is a nuclear RNA-binding protein. It controls hnRNA stability, splicing, IRE

of a thioester and then directly transfers the ubiquitin to targeted substrates (By similarity  
ling; regulation of programmed cell death; regulation of Ras protein signal transduction;  
nses to various activators and repressors. Largest component and core scaffold of the c

mbly after mitosis. Involved in the formation of the transitional endoplasmic reticulum (tE  
e ubiquitination of proteins involved in cell cycle progression, signal transduction and tra  
ila, may not function as a snRNP import receptor as it does not interact with component  
clude membrane and protein trafficking between the Golgi apparatus and the endoplasm  
n- clathrin-coated vesicles, which further mediate biosynthetic protein transport from the  
ment; mitotic G2 DNA damage checkpoint; dendrite morphogenesis; neurogenesis; nucl

r execution of morphogenetic movements of individual cells and groups of cells important  
for many, if not all, actin-mediated events involving membrane invagination. May serve a  
ding; Rac guanyl-nucleotide exchange factor activity; phosphatidylinositol phosphate bir  
plex that plays a key role in pre- mRNA 3'-end formation, recognizing the AAUAAA sign  
S-dependent translation, and translational repression. Hrb98DE represents one of the r

/). Required for regulation of cell proliferation in imaginal disks and germ cells. Acts as a regulator of growth; autophagy; mushroom body development; larval midgut cell program. Contains N- and C-terminal Ser/Thr kinase domains which can autophosphorylate.

R). The transfer of membranes from the endoplasmic reticulum to the Golgi apparatus and transcription. In the SCF complex, serves as a rigid scaffold that organizes the SKP1-F-box

ER, via the Golgi up to the trans Golgi network. Coatamer complex is required for bud-ear-transcribed mRNA poly(A) tail shortening; negative regulation of translation

nt for the formation of the embryonic body plan. Plays a role in regulating dorsal closure as a mediator between signaling molecules and actin organizers at specific phases of the

nal sequence and interacting with poly(A) polymerase and other factors to bring about cleavage. Hrb98DE also regulates tissue polarity.

a negative regulator of hh, ci and dpp expression in the anterior of the eye disk

regulated cell death; protein ubiquitination; lipid storage; Belongs to the ubiquitin-activating enzyme family. May phosphorylate or transphosphorylate other transcription factors. Possesses DNA-binding activity. I

occurs via 50-70 nm transition vesicles which derive from part-rough, part-smooth transition vesicles. May contribute to catalysis through positioning of the substrate protein and RBX1 subunits. May contribute to catalysis through positioning of the substrate

derived from Golgi membranes, and is essential for the retrograde Golgi-to-ER transport of

during embryogenesis. During embryogenesis, acts upstream of wash to regulate the division of the cell cycle. Possible component of the contractile ring or may control its function

cleavage and poly(A) addition. This subunit is involved in the RNA recognition step of the

Essential for progression of the G1 phase of the cell cycle. Negative regulator of the TAF

tional elements of the endoplasmic reticulum (tER). Vesicle budding from the tER is an /  
strate and the ubiquitin-conjugating enzyme. During early metamorphosis, part of the SC

developmental migration of tail hemocytes anteriorly along the ventral midline. May have

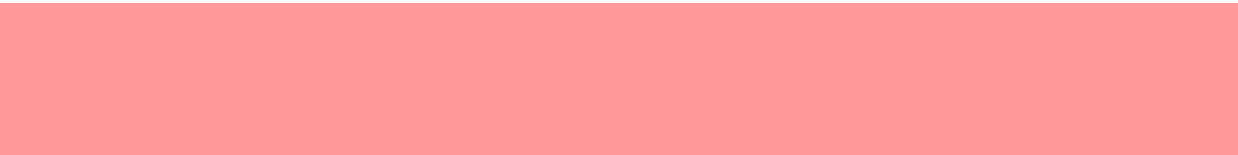

ATP-dependent process. Involved in the ubiquitin-proteasome system. Important for osk  
CF-slmb complex that negatively regulates the InR/PI3K/TOR pathway to activate the pr

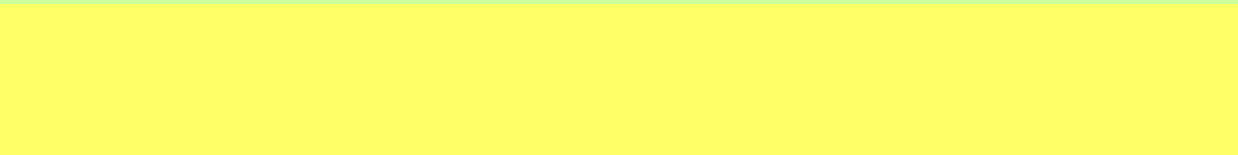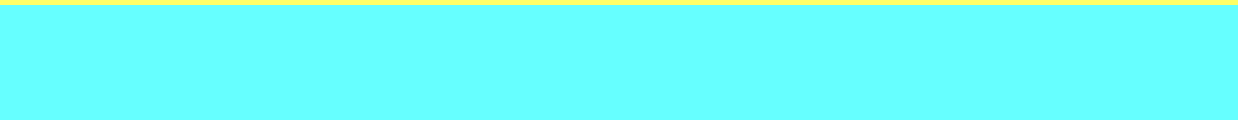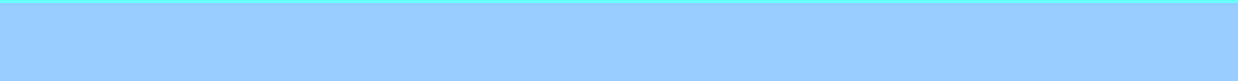



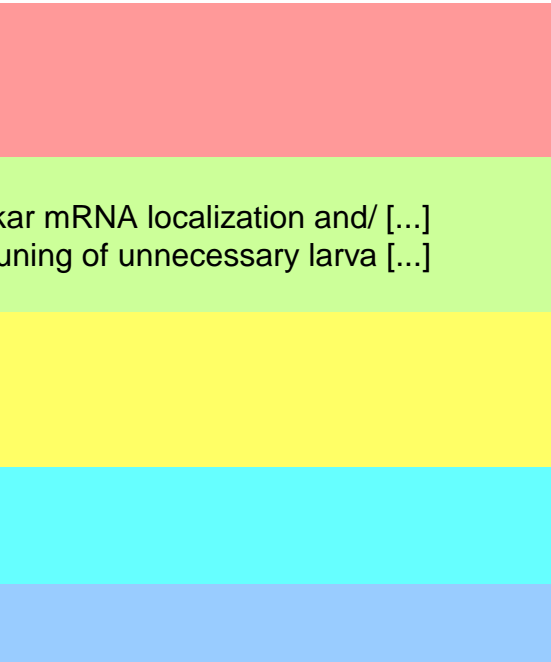

Supplement: s1 [file s1]
