# Supplementary material for: The Drosophila RNA Helicase Belle (DDX3) Non-Autonomously Suppresses Germline Tumorigenesis Via Regulation of a Specific mRNA Set
Source: MDPI journal article supplement (doi:10.3390/cells9030550), 2020-02-26
Supplement: s1 [file s1]

this paper

| number | Gene ID | Gene            | peak regions | CLIP1 | CLIP2 |
|--------|---------|-----------------|--------------|-------|-------|
| 1      | CG9484  | <i>hyd</i>      | CDS          | yes   | yes   |
| 2      | CG34407 | <i>not1</i>     | 3'UTR, CDS   | yes   | yes   |
| 3      | CG5378  | <i>rpn7</i>     | CDS          | yes   | yes   |
| 4      | CG1782  | <i>uba1</i>     | CDS          | yes   | yes   |
| 5      | CG4236  | <i>caf1-55</i>  | CDS          | yes   | yes   |
| 6      | CG2637  | <i>Fs(2)Ket</i> | 3'UTR        | yes   | yes   |
| 7      | CG8487  | <i>garz</i>     | CDS          | yes   | yes   |
| 8      | CG6238  | <i>ssh</i>      | CDS          | yes   | yes   |
| 9      | CG2331  | <i>ter94</i>    | 5'UTR        | yes   | yes   |
| 10     | CG11027 | <i>arf102f</i>  | CDS          | yes   | yes   |
| 11     | CG1877  | <i>cul1</i>     | CDS          | yes   | yes   |
| 12     | CG3186  | <i>elF5A</i>    | CDS          | yes   | yes   |
| 13     | CG42574 | <i>ctrip</i>    | CDS          | yes   | yes   |
| 14     | CG1768  | <i>dia</i>      | CDS          | yes   | yes   |
| 15     | CG7929  | <i>ocn</i>      | CDS          | yes   | yes   |
| 16     | CG8114  | <i>pbl</i>      | CDS          | yes   | mc*   |
| 17     | CG17603 | <i>taf1</i>     | CDS          | yes   | mc*   |
| 18     | CG8416  | <i>rho1</i>     | 3'UTR        | yes   | mc*   |
| 19     | CG6699  | <i>beta'COP</i> | CDS          | yes   | mc*   |
| 20     | CG10110 | <i>Cpsf160</i>  | CDS          | yes   | mc*   |
| 21     | CG2041  | <i>lgs</i>      | CDS          | yes   | mc*   |
| 22     | CG9983  | <i>hrb98de</i>  | CDS          | yes   | yes   |

mc\* medium confiden

**Supplementary Table S3.** List of genes, knockdowns of which provide the morphological defects in the testes according to data of three independent screens and which determined in our CLIP analysis as putative mRNA targets of Belle. RNAi knockdowns of 17 genes determined in CLIP analysis lead to similar phenotypes in case of *belKD* in somatic cyst cells or in germ cells according to the results of at least a one screen (matched by yellow and orange color). Four genes, *not1*, *rpn7*, *rho1*, and *caf1-55*, knockdowns of which provide the same morphological defects in the testes according to data of three independent screenings are marked by orange color.

screen *tj-Gal4* x *UAS-RNAi* (testis)

| Fairchild et al. 2017(PMID:28957323) |                                     |
|--------------------------------------|-------------------------------------|
|                                      | Cyst cells absent                   |
|                                      | phenotype not shown, male sterility |
|                                      | spermatogonial defects              |
|                                      | spermatid defects                   |
|                                      | spermatid defects                   |
|                                      | phenotype not shown, male sterility |
|                                      | no data                             |
|                                      | Cyst cells absent                   |
|                                      | no data                             |
|                                      | Cyst cells absent                   |
|                                      | Cyst cells absent                   |
|                                      | no data                             |
|                                      | no data                             |
|                                      | no data                             |

ce, see Material and Methods

screen *tj-Gal4* x *UAS-RNAi* (testis)

| Yu et al. 2016 (PMID:27471256)                 |         |
|------------------------------------------------|---------|
| Soma-induced germ cell differentiation defects |         |
| Soma-induced germ cell differentiation defects |         |
| Soma-induced germ cell differentiation defects |         |
|                                                | no data |
| Soma-induced germ cell maintenance defects     |         |
|                                                | no data |
|                                                | no data |
| Soma-induced germ cell differentiation defects |         |
|                                                | no data |
| Soma-induced germ cell maintenance defects     |         |
|                                                | no data |
| Soma-induced germ cell differentiation defects |         |
| Soma-induced germ cell differentiation defects |         |
| Soma-induced germ cell differentiation defects |         |
|                                                | no data |
|                                                | no data |
|                                                | normal  |

screen nos-GAL4 x UAS-RNAi (testis)

**Yu et al. 2016 (PMID:27471256)**

|                                                     |
|-----------------------------------------------------|
| GSC maintenance defects(no germ cell survived)      |
| GSC maintenance defects(no germ cell survived)      |
| GSC maintenance defects(no germ cell survived)      |
| no data                                             |
| GSC maintenance defects(a few germ cells survived ) |
| no data                                             |
| no data                                             |
| GSC maintenance defects(a few germ cells survived ) |
| no data                                             |
| GSC maintenance defects(no germ cell survived)      |
| no data                                             |
| GSC maintenance defects(a few germ cells survived ) |
| GSC maintenance defects(no germ cell survived)      |
| GSC maintenance defects(no germ cell survived)      |
| no data                                             |
| no data                                             |
| GSC maintenance defects(a few germ cells survived ) |

screen *Act5-Gal4, UAS-GFP/tub-Gal80ts/ x UAS-RNAi* (testis)

| Liu et al. 2016 (PMID:27484291) |                          |
|---------------------------------|--------------------------|
|                                 | low GSC increase         |
|                                 | medium-low GSC decrease  |
|                                 | medium-high GSC decrease |
|                                 | no data                  |
|                                 | high GSC decrease        |
|                                 | no data                  |
|                                 | no data                  |
|                                 | no data                  |
|                                 | medium-high GSC decrease |
|                                 | no data                  |
|                                 | no data                  |
|                                 | medium-high GSC increase |
|                                 | medium-low GSC increase  |
|                                 | medium-high GSC decrease |
|                                 | low GSC increase         |
|                                 | high GSC decrease        |
|                                 | medium-high GSC increase |
|                                 | high GSC decrease        |
|                                 | no data                  |
|                                 | high GSC decrease        |
|                                 | medium-high GSC decrease |
|                                 | no data                  |

---

**molecular functions**

---

ubiquitination, protein stability / Hh  
deadenylation complex  
ubiquitination, protein stability, 26S proteasome  
ubiquitin-activating enzyme E1  
nucleosome remodelling and deacetylase (NuRD) complex, dREAM complex, tMAC complex  
beta-importin, Ran GTPase binding  
ARF guanyl-nucleotide exchange factor activity; Rab GTPase binding  
actin cytoskeleton regulation, phosphatase, cofilin dephosphorylation  
ubiquitin-proteasome system, ER formation, vesicle budding  
member of Ras superfamily of small GTPases  
E3 ubiquitin-protein ligase complexes  
eukaryotic translation elongation factor 5  
circadian trip/ubiquitin-protein ligase  
Dia-class formin  
protein histidine phosphatase activity, testis specific factor  
Rho guanyl-nucleotide exchange factor  
general transcription factor  
small GTPase  
Beta-coatomer protein of a cytosolic protein complex coatomer that binds to dilysine motifs  
Cleavage and polyadenylation specificity factor 160  
transcription coactivator  
Heterogeneous nuclear ribonucleoprotein at 98DE, RNA-binding

---

### pathway

Ubiquitin mediated proteolysis / Hh  
RNA degradation, CCR4-Not complex  
proteasome-mediated ubiquitin-dependent protein catabolic process  
ubiquitination, protein stability  
nucleosome remodeling factor, cell division, cytokinesis  
nuclear import and export  
endomembrane transport  
protein tyrosine/serine/threonine phosphatase activity, actin binding  
Wingless pathway, Hedgehog pathway  
ADP ribosylation factor 102F, endomembrane transport  
negative regulation of TOR signaling, insulin signaling  
translation elongation  
ubiquitination, protein stability  
cell division/cytokinesis  
no data  
actin cytoskeleton, cell adhesion  
general transcription factor complex TFIID  
actin cytoskeleton, cell adhesion  
retrograde vesicle transport from the Golgi to ER.  
Component of cleavage and polyadenylation specificity factor (CPSF) complex  
signal transduction through the Wnt pathway  
hnRNA stability, splicing, IRES-dependent translation, and translational repression

## CLIP analysis in HEK293T cells

| human homolog                  | Valentin-Vega et al.2016 (PMID:27180681) |
|--------------------------------|------------------------------------------|
| UBR5                           | yes, CDS                                 |
| Cnot1                          | yes, CDS                                 |
| PSMD6                          | no                                       |
| UBA1(CFAP124, POC20, UBE1X)    | no                                       |
| RBBP4, RBBP7                   | yes, CDS                                 |
| KPNB1                          | no                                       |
| GBF1                           | no                                       |
| SSH1, SSH2, SSH3               | no                                       |
| VCP                            | no                                       |
| ARF4,ARF5                      | no                                       |
| CUL1                           | yes, 5'UTR, CDS                          |
| EIF5A, EIF5A1, EIF5A2, EIF5AL1 | yes, CDS                                 |
| TRIP12                         | no                                       |
| DIAPH3, DIAPH1, DIAPH2         | no                                       |
| PHPT1                          | no                                       |
| ECT2                           | no                                       |
| TAF1, TAF1L                    | no                                       |
| RHOA, RHOC, RHOB               | no                                       |
| COPB1                          | yes, CDS                                 |
| CPSF1                          | no                                       |
| BCL9L                          | no                                       |
| HNRNPA2B1                      | yes, CDS                                 |



| Gene            |
|-----------------|
| <i>hyd</i>      |
| <i>not1</i>     |
| <i>rpn7</i>     |
| <i>uba1</i>     |
| <i>caf1-55</i>  |
| <i>Fs(2)Ket</i> |
| <i>garz</i>     |
| <i>ssh</i>      |
| <i>ter94</i>    |
| <i>arf102f</i>  |
| <i>cul1</i>     |
| <i>eIF5A</i>    |
| <i>ctrip</i>    |
| <i>dia</i>      |
| <i>ocn</i>      |
| <i>pbl</i>      |
| <i>taf1</i>     |
| <i>rho1</i>     |
| <i>beta'COP</i> |
| <i>Cpsf160</i>  |
| <i>lgs</i>      |
| <i>hrb98de</i>  |
