# Supplementary material for: The Drosophila RNA Helicase Belle (DDX3) Non-Autonomously Suppresses Germline Tumorigenesis Via Regulation of a Specific mRNA Set
Source: MDPI journal article supplement (doi:10.3390/cells9030550), 2020-02-26
Supplement: s1 [file s1]

| 5UTR      | 3UTR    | coding        | ncRNA          | intron  |
|-----------|---------|---------------|----------------|---------|
| Arf51F    | CG5432  | 14-3-3epsilon | bft            | Arf79F  |
| cep290    | Act5C   | Acp26Aa       | CR43314        | arm     |
| Fuca      | ACXA    | Acp76A        | CR30121        | axo     |
| CG12362   | ACXC    | AIF           | CR31386        | B4      |
| CG1288    | bon     | AIF           | CR31386        | B4      |
| CG1394    | CG10055 | alpha-Est6    | CR42862        | bon     |
| CG14995   | CG11125 | APC4          | CR43260        | bru3    |
| CG15219   | CG11141 | apolpp        | CR43334        | bs      |
| CG15418   | CG11779 | apolpp        | ban            | byn     |
| CG17140   | CG12362 | Arf102F       | CR43334        | c11.1   |
| CG42284   | CG13700 | ATPCL         | ban            | CAH2    |
| CG31178   | CG13954 | ave           | CR43615        | caps    |
| CG33934   | CG13739 | CG9263        | CR43627        | CG10384 |
| CG34312   | CG13989 | beta'COP      | CR43651        | CG10936 |
| CG42558   | CG14234 | betaTub85D    | mir-14         | CG11873 |
| CG4266    | CG15124 | betaTub85D    | CR43761        | CG12983 |
| CG17344   | CG15336 | bor           | CR43839        | CG14372 |
| CG44435   | CG15337 | boss          | CR43906        | CG14535 |
| CG44435   | CG15618 | CaBP1         | CR44031        | CG15506 |
| CG9133    | CG1662  | Caf1-55       | CR44062        | CG15630 |
| CG9133    | CG16782 | Capr          | CR44066        | CG17684 |
| Cul3      | CG17097 | Cchl          | CR44267        | CG17985 |
| DopEcR    | CG17139 | Cct1          | CR44833        | CG2082  |
| FER       | CG17377 | CG10252       | CR45267        | CG3168  |
| for       | CG1902  | CG10407       | CR45361        | CG31709 |
| larp      | CG2127  | CG10694       | mir-1          | CG32264 |
| MenI-2    | CG30271 | rhi           | CR45942        | CG32719 |
| MME1      | CG31226 | CG1138        | mir-12         | CG32809 |
| Msp300    | CG3124  | CG11714       | mir-304        | CG33111 |
| Octbeta2R | CG31441 | CG12147       | mir-9b         | CG33111 |
| Ppi1      | CG31740 | CG12177       | iab-8          | CG33158 |
| Ppi1      | CG32192 | CG12395       | mir-92a        | CG34357 |
| robl62A   | CG32388 | CG12547       | mir-184        | CG34357 |
| S-Lap8    | CG32572 | CG12581       | CR44206        | CG3655  |
| SCCRO3    | CG32591 | CG12861       | mir-305        | CG40470 |
| sif       | CG32651 | CG12923       | mir-318        | CG40470 |
| CG43201   | CG34235 | CG12983       | mir-994        | CG41378 |
| CG43178   | CG34315 | CG13083       | snoRNA:Psi18S- | CG42321 |
| CG43171   | CG42847 | CG13527       | CR43960        | CG42321 |
| sol       | CG42851 | CG13611       |                | CG42342 |
| TER94     | CG44434 | CG13700       |                | CG42346 |
| toc       | CG45154 | CG13865       |                | CG42389 |
| tomboy20  | CG4538  | CG13978       |                | CG42458 |
| Uba1      | CG4612  | CG14013       |                | CG42524 |
|           | CG4836  | CG14043       |                | CG42750 |
|           | CG5162  | CG14204       |                | CG43219 |
|           | CG6091  | CG14215       |                | CG43366 |
|           | CG6512  | CG14354       |                | CG43373 |
|           | CG7309  | CG14355       |                | CG43427 |
|           | CG7369  | CG14355       |                | CG43759 |
|           | CG7414  | CG14480       |                | CG44422 |
|           | CG9570  | CG14528       |                | CG45782 |
|           | Cpr     | CG14537       |                | CG5326  |
|           | Dbp80   | CG14572       |                | CG7544  |
|           | djl     | CG14718       |                | CG7990  |
|           | Dp1     | CG14838       |                | CG8399  |

|           |         |           |
|-----------|---------|-----------|
| eIF3-S8   | CG14861 | ckd       |
| Eno       | CG14861 | Cngl      |
| Fit1      | CG14995 | cpo       |
| Fs(2)Ket  | CG15109 | cpx       |
| glob1     | CG15111 | Ctr1A     |
| Hipk      | CG15144 | cysu      |
| kdn       | CG15543 | DIP-beta  |
| l(1)G0320 | CG15873 | disco-r   |
| MenI-1    | CG15892 | dnc       |
| Mical     | CG1640  | DopEcR    |
| nonA      | CG16782 | dpr11     |
| Not1      | CG16833 | dpr13     |
| omd       | CG16972 | dpr8      |
| Past1     | CG17139 | dpy       |
| psq       | CG17140 | ds        |
| Rb97D     | CG17217 | ds        |
| Rho1      | CG17375 | ds        |
| CG43172   | CG17470 | Dscam2    |
| CG43200   | CG17625 | EcR       |
| CG46305   | CG17652 | ed        |
| sm        | CG17691 | esn       |
| sm        | Rpt1    | Frq2      |
| Stim      | CG18048 | fz2       |
| stops     | CG18662 | GEFmeso   |
| sut4      | CG1902  | geko      |
| Taf12L    | CG1958  | Gmap      |
| twin      | CG1988  | Gmap      |
| Yp1       | CG1999  | grp       |
|           | CG2127  | gsb-n     |
|           | CG2137  | hbn       |
|           | CG2921  | hdc       |
|           | CG30196 | heph      |
|           | CG30271 | heph      |
|           | CG31010 | hppy      |
|           | CG31294 | Hr4       |
|           | CG31528 | Indy      |
|           | CG31635 | jigr1     |
|           | CG3164  | Jupiter   |
|           | CG31751 | Jupiter   |
|           | CG31784 | Kat60     |
|           | CG31817 | kek2      |
|           | CG31817 | kl-3      |
|           | CG31819 | kl-3      |
|           | CG31909 | kl-3      |
|           | CG31948 | ko        |
|           | CG32081 | l(3)neo38 |
|           | CG32087 | Lim1      |
|           | CG32117 | Lim1      |
|           | CG32119 | LRP1      |
|           | CG32119 | LRR       |
|           | CG32181 | mam       |
|           | ntc     | Mical     |
|           | CG32369 | mim       |
|           | CG43439 | Myo81F    |
|           | CG32436 | nord      |
|           | CG32459 | Npl4      |
|           | CG32944 | nuf       |
|           | eIF4G2  | nuf       |
|           | eIF4G2  | oc        |

|         |          |
|---------|----------|
| CG33287 | ocn      |
| CG33290 | CG43783  |
| CG33490 | Parp     |
| Indy-2  | PCB      |
| CG30058 | Pde1c    |
| Orc3    | pdm3     |
| CG34425 | Pli      |
| CG3635  | Ppn      |
| CG4161  | Ppr-Y    |
| CG4198  | Proc     |
| CG42266 | Prosap   |
| CG30060 | ptc      |
| CG4631  | Ptpmeg   |
| CG42393 | pyd      |
| CG42557 | Pzl      |
| CG42684 | RapGAP1  |
| CG31788 | Rbfox1   |
| CG42788 | Rbfox1   |
| CG42827 | Rbfox1   |
| CG43121 | rg       |
| CG4329  | CG15465  |
| CG43319 | RhoGAP1A |
| CG43343 | RhoGEF3  |
| CG43731 | robo3    |
| CG43755 | RpS20    |
| CG43755 | Sb       |
| CG44004 | sdt      |
| CG4434  | Sema1a   |
| CG4434  | Sh       |
| CG4434  | shakB    |
| CG44434 | shep     |
| CG44435 | CG46320  |
| CG44434 | sima     |
| CG45066 | slo      |
| CG4572  | SLO2     |
| CG46059 | SLO2     |
| CG4810  | sm       |
| CG4836  | Smg5     |
| CG4836  | Snmp1    |
| CG4836  | spz3     |
| CG4836  | step     |
| CG5122  | Sulf1    |
| CG5122  | Ten-a    |
| CG5144  | timeout  |
| CG5521  | toc      |
| CG5614  | trv      |
| CG6230  | TyrRll   |
| CG6304  | Wdr62    |
| CG6380  | Xrp1     |
| CG6404  |          |
| CG6412  |          |
| CG6420  |          |
| CG6441  |          |
| CG6441  |          |
| CG6481  |          |
| CG6652  |          |
| CG6661  |          |
| CG7059  |          |
| CG7069  |          |

CG7094  
CG7311  
CG7408  
CG7848  
CG8042  
CG8188  
CG8520  
CG8568  
CG8746  
CG9130  
CG9130  
CG9240  
CG9253  
CG9254  
CG9316  
CG9391  
CG9393  
CG9510  
CG9590  
CG9641  
CG9650  
CG9920  
Chc  
Ciao1  
cnc  
Col4a1  
Col4a1  
COX4  
Cpsf160  
ctrip  
Cul1  
Cyp12c1  
Cyp4p3  
Dbp73D  
Dgk  
dia  
didum  
disp  
djl  
Dnah3  
DppIII  
Drsl1  
Ebp  
ed  
Ef1alpha48D  
eIF-2beta  
eIF-5A  
eIF4E-5  
Eip75B  
Elk  
EMC3  
Erk7  
Ext2  
FBXO11  
Frl  
fry  
fry  
FucTB  
garz

gbb  
Gel  
GluProRS  
Gnf1  
gw  
HBS1  
heph  
His4r  
hmw  
Hrb98DE  
Hsc70-2  
Hsc70-3  
Hsc70-5  
Hsp60A  
Hsp60B  
Hsp60C  
Hsp60C  
hyd  
hyd  
ldgf4  
Incenp  
isopeptidase-T-3  
JIL-1  
JYalpha  
KdelR  
kl-2  
Klp67A  
lgs  
loopin-1  
loopin-1  
mad2  
mfas  
mib2  
CG31407  
mino  
Miro  
Msp300  
Mst77F  
mud  
na  
Nop17l  
Not1  
Nph  
CG32141  
CG7768  
Obp99d  
ocn  
Or67d  
orb2  
pbl  
Pdi  
CG8701  
Pex11  
Pink1  
Pka-C3  
Pmm45A  
Pmm45A  
Pms2  
Porin2

Prat  
S-Lap4  
S-Lap4  
S-Lap4  
Rpn13R  
RhoGEF3  
RpL36  
Rpn6  
Rpn7  
S-Lap2  
S-Lap3  
S-Lap3  
S-Lap5  
S-Lap7  
S-Lap8  
Sac1  
Sac1  
scpr-C  
Sec31  
I-3  
shot  
sick  
sip2  
SKIP  
sle  
Slmap  
sns  
Socs44A  
Spase12  
Srpk79D  
ssh  
ssh  
Su(z)12  
Taf1  
CG2750  
Tep2  
tHMG1  
Tim17b2  
toc  
Tom7  
Tom70  
Trc8  
Trf4-2  
TrpRS-m  
Uba1  
Ude  
unc-5  
upSET  
Usp8  
Vps8  
Xrp1  
Ziz  
zormin

Supplementary Table S1. List of RNA targets determined by Piranha software with selection conditions  $p > 0.87$  for CLIP1 and with at least two unique reads in CLIP2
