# Supplementary material for: The Drosophila RNA Helicase Belle (DDX3) Non-Autonomously Suppresses Germline Tumorigenesis Via Regulation of a Specific mRNA Set
Source: MDPI journal article supplement (doi:10.3390/cells9030550), 2020-02-26
Supplement: s1 [file s1]

|                                               |
|-----------------------------------------------|
| <b>Functional Annotation Table DAVID v6.8</b> |
|-----------------------------------------------|

| ID          | Gene Name                                                 |
|-------------|-----------------------------------------------------------|
| FBgn0013749 | ADP ribosylation factor at 102F(Arf102F)                  |
| FBgn0020236 | ATP citrate lyase(ATPCL)                                  |
| FBgn0002855 | Accessory gland protein 26Aa(Acp26Aa)                     |
| FBgn0052707 | Anaphase Promoting Complex subunit 4(APC4)                |
| FBgn0031392 | Apoptosis inducing factor(AIF)                            |
| FBgn0039104 | CG10252 gene product from transcript CG10252-RA(CG10252)  |
| FBgn0039147 | CG10694 gene product from transcript CG10694-RA(CG10694)  |
| FBgn0033397 | CG10843 gene product from transcript CG10843-RA(Cyp4p3)   |
| FBgn0037325 | CG12147 gene product from transcript CG12147-RA(CG12147)  |
| FBgn0030510 | CG12177 gene product from transcript CG12177-RA(CG12177)  |
| FBgn0250845 | CG1288 gene product from transcript CG1288-RA(CG1288)     |
| FBgn0033784 | CG13322 gene product from transcript CG13322-RA(CG13322)  |
| FBgn0034776 | CG13527 gene product from transcript CG13527-RB(CG13527)  |
| FBgn0033403 | CG13739 gene product from transcript CG13739-RA(CG13739)  |
| FBgn0035168 | CG13889 gene product from transcript CG13889-RB(cep290)   |
| FBgn0033405 | CG13954 gene product from transcript CG13954-RC(CG13954)  |
| FBgn0039518 | CG13978 gene product from transcript CG13978-RA(CG13978)  |
| FBgn0031659 | CG14043 gene product from transcript CG14043-RA(CG14043)  |
| FBgn0031032 | CG14204 gene product from transcript CG14204-RB(CG14204)  |
| FBgn0031052 | CG14215 gene product from transcript CG14215-RA(CG14215)  |
| FBgn0031065 | CG14234 gene product from transcript CG14234-RA(CG14234)  |
| FBgn0039611 | CG14528 gene product from transcript CG14528-RA(CG14528)  |
| FBgn0031954 | CG14537 gene product from transcript CG14537-RA(CG14537)  |
| FBgn0037828 | CG14690 gene product from transcript CG14690-RA(tomboy20) |
| FBgn0038280 | CG14861 gene product from transcript CG14861-RA(CG14861)  |
| FBgn0035497 | CG14995 gene product from transcript CG14995-RA(CG14995)  |
| FBgn0034419 | CG15111 gene product from transcript CG15111-RB(CG15111)  |
| FBgn0030009 | CG15336 gene product from transcript CG15336-RD(CG15336)  |
| FBgn0031554 | CG15418 gene product from transcript CG15418-RA(CG15418)  |
| FBgn0039799 | CG15543 gene product from transcript CG15543-RB(CG15543)  |
| FBgn0031077 | CG15618 gene product from transcript CG15618-RB(CG15618)  |
| FBgn0035003 | CG15873 gene product from transcript CG15873-RA(CG15873)  |
| FBgn0030478 | CG1640 gene product from transcript CG1640-RB(CG1640)     |
| FBgn0030481 | CG1662 gene product from transcript CG1662-RA(CG1662)     |
| FBgn0029659 | CG16782 gene product from transcript CG16782-RA(CG16782)  |
| FBgn0265264 | CG17097 gene product from transcript CG17097-RB(CG17097)  |
| FBgn0069354 | CG17137 gene product from transcript CG17137-RB(Porin2)   |
| FBgn0260454 | CG17139 gene product from transcript CG17139-RA(CG17139)  |
| FBgn0260453 | CG17140 gene product from transcript CG17140-RA(CG17140)  |
| FBgn0040510 | CG17176 gene product from transcript CG17176-RG(ACXA)     |
| FBgn0032869 | CG17470 gene product from transcript CG17470-RA(CG17470)  |
| FBgn0035640 | CG17498 gene product from transcript CG17498-RA(mad2)     |
| FBgn0031361 | CG17652 gene product from transcript CG17652-RB(CG17652)  |

|             |                                                          |
|-------------|----------------------------------------------------------|
| FBgn0039993 | CG17691 gene product from transcript CG17691-RC(CG17691) |
| FBgn0037435 | CG18048 gene product from transcript CG18048-RA(CG18048) |
| FBgn0042712 | CG1898 gene product from transcript CG1898-RB(HBS1)      |
| FBgn0034689 | CG2921 gene product from transcript CG2921-RA(CG2921)    |
| FBgn0050058 | CG30058 gene product from transcript CG30058-RA(CG30058) |
| FBgn0011725 | CG31137 gene product from transcript CG31137-RE(twin)    |
| FBgn0051441 | CG31441 gene product from transcript CG31441-RB(CG31441) |
| FBgn0025683 | CG3164 gene product from transcript CG3164-RA(CG3164)    |
| FBgn0051784 | CG31784 gene product from transcript CG31784-RC(CG31784) |
| FBgn0052081 | CG32081 gene product from transcript CG32081-RA(CG32081) |
| FBgn0052369 | CG32369 gene product from transcript CG32369-RC(CG32369) |
| FBgn0052572 | CG32572 gene product from transcript CG32572-RA(CG32572) |
| FBgn0064119 | CG33934 gene product from transcript CG33934-RE(CG33934) |
| FBgn0085264 | CG34235 gene product from transcript CG34235-RB(CG34235) |
| FBgn0085341 | CG34312 gene product from transcript CG34312-RA(CG34312) |
| FBgn0085344 | CG34315 gene product from transcript CG34315-RB(CG34315) |
| FBgn0085436 | CG34407 gene product from transcript CG34407-RG(Not1)    |
| FBgn0031881 | CG3476 gene product from transcript CG3476-RA(CG3476)    |
| FBgn0032981 | CG3635 gene product from transcript CG3635-RB(CG3635)    |
| FBgn0028892 | CG4161 gene product from transcript CG4161-RB(CG4161)    |
| FBgn0259739 | CG42393 gene product from transcript CG42393-RA(CG42393) |
| FBgn0034598 | CG4266 gene product from transcript CG4266-RD(CG4266)    |
| FBgn0261570 | CG42684 gene product from transcript CG42684-RB(CG42684) |
| FBgn0261859 | CG42788 gene product from transcript CG42788-RC(CG42788) |
| FBgn0262009 | CG42827 gene product from transcript CG42827-RC(CG42827) |
| FBgn0263024 | CG43319 gene product from transcript CG43319-RA(CG43319) |
| FBgn0263048 | CG43343 gene product from transcript CG43343-RB(CG43343) |
| FBgn0264307 | CG43782 gene product from transcript CG43782-RH(orb2)    |
| FBgn0039071 | CG4434 gene product from transcript CG4434-RA(CG4434)    |
| FBgn0266436 | CG45066 gene product from transcript CG45066-RA(CG45066) |
| FBgn0038745 | CG4538 gene product from transcript CG4538-RC(CG4538)    |
| FBgn0267363 | CG45760 gene product from transcript CG45760-RB(JYalpha) |
| FBgn0259795 | CG4750 gene product from transcript CG4750-RC(loopin-1)  |
| FBgn0037994 | CG4810 gene product from transcript CG4810-RA(CG4810)    |
| FBgn0270925 | CG4836 gene product from transcript CG4836-RC(CG4836)    |
| FBgn0034258 | CG4954 gene product from transcript CG4954-RB(eIF3-S8)   |
| FBgn0032471 | CG5122 gene product from transcript CG5122-RA(CG5122)    |
| FBgn0039425 | CG5432 gene product from transcript CG5432-RA(CG5432)    |
| FBgn0040508 | CG5983 gene product from transcript CG5983-RB(ACXC)      |
| FBgn0036180 | CG6091 gene product from transcript CG6091-RF(CG6091)    |
| FBgn0027582 | CG6230 gene product from transcript CG6230-RA(CG6230)    |
| FBgn0032632 | CG6380 gene product from transcript CG6380-RB(CG6380)    |
| FBgn0027615 | CG6404 gene product from transcript CG6404-RA(CG6404)    |
| FBgn0039451 | CG6420 gene product from transcript CG6420-RB(CG6420)    |
| FBgn0036702 | CG6512 gene product from transcript CG6512-RB(CG6512)    |
| FBgn0036403 | CG6661 gene product from transcript CG6661-RA(CG6661)    |
| FBgn0038957 | CG7059 gene product from transcript CG7059-RA(CG7059)    |

|             |                                                          |
|-------------|----------------------------------------------------------|
| FBgn0032650 | CG7094 gene product from transcript CG7094-RA(CG7094)    |
| FBgn0031728 | CG7235 gene product from transcript CG7235-RA(Hsp60C)    |
| FBgn0032314 | CG7309 gene product from transcript CG7309-RC(CG7309)    |
| FBgn0037188 | CG7369 gene product from transcript CG7369-RA(CG7369)    |
| FBgn0036765 | CG7408 gene product from transcript CG7408-RB(CG7408)    |
| FBgn0037135 | CG7414 gene product from transcript CG7414-RC(CG7414)    |
| FBgn0036415 | CG7768 gene product from transcript CG7768-RA(CG7768)    |
| FBgn0027554 | CG8042 gene product from transcript CG8042-RA(CG8042)    |
| FBgn0034013 | CG8166 gene product from transcript CG8166-RB(unc-5)     |
| FBgn0011660 | CG8169 gene product from transcript CG8169-RA(Pms2)      |
| FBgn0029175 | CG8433 gene product from transcript CG8433-RB(Ext2)      |
| FBgn0033734 | CG8520 gene product from transcript CG8520-RA(CG8520)    |
| FBgn0036398 | CG9007 gene product from transcript CG9007-RB(upSET)     |
| FBgn0030669 | CG9240 gene product from transcript CG9240-RA(CG9240)    |
| FBgn0028513 | CG9254 gene product from transcript CG9254-RA(CG9254)    |
| FBgn0032878 | CG9316 gene product from transcript CG9316-RA(CG9316)    |
| FBgn0032076 | CG9510 gene product from transcript CG9510-RD(CG9510)    |
| FBgn0031085 | CG9570 gene product from transcript CG9570-RA(CG9570)    |
| FBgn0038360 | CG9590 gene product from transcript CG9590-RA(CG9590)    |
| FBgn0029939 | CG9650 gene product from transcript CG9650-RG(CG9650)    |
| FBgn0038200 | CG9920 gene product from transcript CG9920-RA(CG9920)    |
| FBgn0263979 | Chromatin assembly factor 1, p55 subunit(Caf1-55)        |
| FBgn0000299 | Collagen type IV(Cg25C)                                  |
| FBgn0015509 | Cullin 1(Cul1)                                           |
| FBgn0261268 | Cullin 3(Cul3)                                           |
| FBgn0015623 | Cytochrome P450 reductase(Cpr)                           |
| FBgn0038925 | Cytochrome c heme lyase(Cchl)                            |
| FBgn0032833 | Cytochrome c oxidase subunit 4(COX4)                     |
| FBgn0027835 | Dodeca-satellite-binding protein 1(Dp1)                  |
| FBgn0035538 | Dopamine/Ecdysteroid receptor(DopEcR)                    |
| FBgn0052274 | Drosomycin-like 1(Drsl1)                                 |
| FBgn0032292 | ER Membrane protein Complex 3(EMC3)                      |
| FBgn0011589 | Eag-like K[+] channel(Elk)                               |
| FBgn0000568 | Ecdysone-induced protein 75B(Eip75B)                     |
| FBgn0000579 | Enolase(Eno)                                             |
| FBgn0000723 | FER ortholog (H. sapiens)(FER)                           |
| FBgn0262743 | Female sterile (2) Ketel(Fs(2)Ket)                       |
| FBgn0035498 | Fermitin 1(Fit1)                                         |
| FBgn0010225 | Gelsolin(Gel)                                            |
| FBgn0004913 | Germ line transcription factor 1(Gnf1)                   |
| FBgn0005674 | Glutamyl-prolyl-tRNA synthetase(Aats-glupro)             |
| FBgn0011244 | Heat shock protein 60 related(Hsp60B)                    |
| FBgn0015245 | Heat shock protein 60(Hsp60)                             |
| FBgn0001217 | Heat shock protein cognate 2(Hsc70-2)                    |
| FBgn0001215 | Heterogeneous nuclear ribonucleoprotein at 98DE(Hrb98DE) |
| FBgn0013981 | Histone H4 replacement(His4r)                            |
| FBgn0035142 | Homeodomain interacting protein kinase(Hipk)             |

|             |                                                      |
|-------------|------------------------------------------------------|
| FBgn0260466 | I'm not dead yet 2(Indy-2)                           |
| FBgn0026415 | Imaginal disc growth factor 4(Idgf4)                 |
| FBgn0261624 | Inhibitor-3(I-3)                                     |
| FBgn0020412 | JIL-1 kinase(JIL-1)                                  |
| FBgn0267330 | KDEL receptor(KdelR)                                 |
| FBgn0004379 | Kinesin-like protein at 67A(Klp67A)                  |
| FBgn0261618 | La related protein(larp)                             |
| FBgn0086915 | Male-specific transcript 77F(Mst77F)                 |
| FBgn0029154 | Malic enzyme like-1(Menl-1)                          |
| FBgn0029153 | Malic enzyme like-2(Menl-2)                          |
| FBgn0039140 | Mitochondrial Rho(Miro)                              |
| FBgn0053208 | Molecule interacting with CasL(Mical)                |
| FBgn0261836 | Muscle-specific protein 300 kDa(Msp300)              |
| FBgn0033224 | Nop17 like(Nop17l)                                   |
| FBgn0039735 | Nucleophosmin(Nph)                                   |
| FBgn0038063 | Octopamine beta2 receptor(Octbeta2R)                 |
| FBgn0036080 | Odorant receptor 67d(Or67d)                          |
| FBgn0039684 | Odorant-binding protein 99d(Obp99d)                  |
| FBgn0029891 | PTEN-induced putative kinase 1(Pink1)                |
| FBgn0033377 | Phosphomannomutase 45A(Pmm45A)                       |
| FBgn0004901 | Phosphoribosylamidotransferase(Prat)                 |
| FBgn0051025 | Protein phosphatase 1c interacting protein 1(Ppi1)   |
| FBgn0016693 | Putative Achaete Scute Target 1(Past1)               |
| FBgn0029745 | Regulatory particle non-ATPase 13-related(Rpn13R)    |
| FBgn0028688 | Regulatory particle non-ATPase 7(Rpn7)               |
| FBgn0028687 | Regulatory particle triple-A ATPase 1(Rpt1)          |
| FBgn0087002 | Retinoid- and fatty acid-binding glycoprotein(Rfabg) |
| FBgn0264707 | Rho guanine nucleotide exchange factor 3(RhoGEF3)    |
| FBgn0037879 | SCP-containing protein C(scpr-C)                     |
| FBgn0025702 | Serine-arginine protein kinase at 79D(Srpk79D)       |
| FBgn0051163 | Shal K[+] channel interacting protein(SKIP)          |
| FBgn0040623 | Spase 12-subunit(Spase12)                            |
| FBgn0045770 | Sperm-Leucylaminopeptidase 3(S-Lap3)                 |
| FBgn0052064 | Sperm-Leucylaminopeptidase 4(S-Lap4)                 |
| FBgn0033860 | Sperm-Leucylaminopeptidase 5(S-Lap5)                 |
| FBgn0033868 | Sperm-Leucylaminopeptidase 7(S-Lap7)                 |
| FBgn0034132 | Sperm-Leucylaminopeptidase 8(S-Lap8)                 |
| FBgn0033266 | Suppressor of Cytokine Signaling at 44A(Socs44A)     |
| FBgn0031623 | TBP-associated factor 30kD subunit alpha-2(Taf12L)   |
| FBgn0039668 | TRC8 ortholog(Trc8)                                  |
| FBgn0041182 | Thioester-containing protein 2(Tep2)                 |
| FBgn0020371 | Translocase inner membrane 17(Tim17b2)               |
| FBgn0033357 | Translocase of outer membrane 7(Tom7)                |
| FBgn0032397 | Translocase of outer membrane 70(Tom70)              |
| FBgn0023143 | Ubiquitin activating enzyme 1(Uba1)                  |
| FBgn0038862 | Ubiquitin specific protease 8(Usp8)                  |
| FBgn0039226 | Uracil-DNA degrading factor(Ude)                     |

|             |                                                      |
|-------------|------------------------------------------------------|
| FBgn0004045 | Yolk protein 1(Yp1)                                  |
| FBgn0260486 | Zizimin ortholog (H. sapiens)(Ziz)                   |
| FBgn0015574 | alpha-Esterase-6(alpha-Est6)                         |
| FBgn0050476 | aveugle(ave)                                         |
| FBgn0040237 | belphegor(bor)                                       |
| FBgn0003889 | beta-Tubulin at 85D(betaTub85D)                      |
| FBgn0023097 | bonus(bon)                                           |
| FBgn0000206 | bride of sevenless(boss)                             |
| FBgn0260794 | circadian trip(ctrip)                                |
| FBgn0011202 | diaphanous(dia)                                      |
| FBgn0029088 | dispatched(dispatched)                               |
| FBgn0037463 | don juan like(djl)                                   |
| FBgn0000547 | echinoid(ed)                                         |
| FBgn0260634 | eukaryotic translation initiation factor 4G2(eIF4G2) |
| FBgn0264560 | gartenzwerg(garz)                                    |
| FBgn0051992 | gawky(gw)                                            |
| FBgn0024234 | glass bottom boat(gbb)                               |
| FBgn0011224 | hephaestus(heph)                                     |
| FBgn0002431 | hyperplastic discs(hyd)                              |
| FBgn0261955 | knockdown(kdn)                                       |
| FBgn0005654 | latheo(lat)                                          |
| FBgn0001313 | male fertility factor kl2(kl-2)                      |
| FBgn0260745 | midline fasciclin(mfas)                              |
| FBgn0086442 | mind bomb 2(mib2)                                    |
| FBgn0027579 | minotaur(mino)                                       |
| FBgn0002873 | mushroom body defect(mud)                            |
| FBgn0002917 | narrow abdomen(na)                                   |
| FBgn0004227 | no on or off transient A(nonA)                       |
| FBgn0035461 | nutcracker(ntc)                                      |
| FBgn0041102 | ocnus(ocn)                                           |
| FBgn0038168 | oocyte maintenance defects(omd)                      |
| FBgn0263102 | pipsqueak(psq)                                       |
| FBgn0004400 | rhino(rhi)                                           |
| FBgn0031878 | septin interacting protein 2(sip2)                   |
| FBgn0013733 | short stop(shot)                                     |
| FBgn0263873 | sickie(sick)                                         |
| FBgn0037810 | slender lobes(sle)                                   |
| FBgn0029157 | slingshot(ssh)                                       |
| FBgn0086704 | slow termination of phototransduction(stops)         |
| FBgn0003464 | small optic lobes(sol)                               |
| FBgn0003435 | smooth(sm)                                           |
| FBgn0024189 | sticks and stones(sns)                               |
| FBgn0085447 | still life(sif)                                      |
| FBgn0015600 | toucan(toc)                                          |

## Species

[illegible]

[illegible]

[illegible]



[illegible]

[illegible]

**GOTERM\_BP\_DIRECT**

GO:0006471~protein ADP-ribosylation,GO:0007264~small GTPase mediated signal transduction,GO:0006085~acetyl-CoA biosynthetic process,GO:0006101~citrate metabolic process,GO:0006629~lipid metabolism,GO:0007618~mating,GO:0018991~oviposition,GO:0030728~ovulation,GO:0032504~multicellular organismal development,GO:0016567~protein ubiquitination,GO:0030071~regulation of mitotic metaphase/anaphase transition,GO:0006915~apoptotic process,GO:0010623~programmed cell death involved in cell development,GO:0007259~cell cycle

GO:0006289~nucleotide-excision repair,GO:0043161~proteasome-mediated ubiquitin-dependent proteolysis,GO:0055114~oxidation-reduction process,GO:0006468~protein phosphorylation,GO:0006897~endocytosis,GO:0008360~regulation of cell shape,GO:0006152~purine nucleoside catabolic process,

GO:0009314~response to radiation,GO:0030308~negative regulation of cell growth,GO:0043065~positiv  
GO:0006508~proteolysis,

GO:0042048~olfactory behavior,GO:0042384~cilium assembly,GO:0060271~cilium morphogenesis,

GO:0006506~GPI anchor biosynthetic process,  
GO:0006839~mitochondrial transport,GO:0007399~nervous system development,  
GO:0022416~chaeta development,GO:0035220~wing disc development,  
GO:0051292~nuclear pore complex assembly,

GO:0006508~proteolysis,

GO:0006626~protein targeting to mitochondrion,GO:0016031~tRNA import into mitochondrion,GO:0030

GO:0035071~salivary gland cell autophagic cell death,GO:0048102~autophagic cell death,

GO:0006139~nucleobase-containing compound metabolic process,  
GO:0030488~tRNA methylation,  
GO:0006508~proteolysis,  
GO:0009058~biosynthetic process,

GO:0006629~lipid metabolic process,GO:0016042~lipid catabolic process,GO:0032504~multicellular org  
GO:0006811~ion transport,GO:0006839~mitochondrial transport,GO:0019233~sensory perception of pa  
GO:0055085~transmembrane transport,  
GO:0055085~transmembrane transport,  
GO:0006171~cAMP biosynthetic process,GO:0007189~adenylate cyclase-activating G-protein coupled r  
GO:0007498~mesoderm development,  
GO:0000278~mitotic cell cycle,GO:0007094~mitotic spindle assembly checkpoint,GO:0007346~regulati  
GO:0000462~maturation of SSU-rRNA from tricistronic rRNA transcript (SSU-rRNA, 5.8S rRNA, LSU-rR

GO:0046949~fatty-acyl-CoA biosynthetic process,  
GO:0008033~tRNA processing,GO:0030488~tRNA methylation,  
GO:0006412~translation,GO:0032790~ribosome disassembly,GO:0045089~positive regulation of innate  
GO:0006479~protein methylation,GO:2001020~regulation of response to DNA damage stimulus,

GO:0000289~nuclear-transcribed mRNA poly(A) tail shortening,GO:0006402~mRNA catabolic process,(

GO:0003333~amino acid transmembrane transport,  
GO:0006508~proteolysis,  
GO:0002121~inter-male aggressive behavior,GO:0007476~imaginal disc-derived wing morphogenesis,G  
GO:0006814~sodium ion transport,GO:0055085~transmembrane transport,GO:0071422~succinate tran

GO:0000289~nuclear-transcribed mRNA poly(A) tail shortening,GO:0006402~mRNA catabolic process,(  
GO:0006412~translation,GO:0006839~mitochondrial transport,GO:0006844~acyl carnitine transport,GO  
GO:0006629~lipid metabolic process,GO:0016042~lipid catabolic process,  
GO:0006479~protein methylation,

GO:0002121~inter-male aggressive behavior,GO:0007165~signal transduction,GO:0007476~imaginal d

GO:0032504~multicellular organism reproduction,  
GO:0005975~carbohydrate metabolic process,GO:0006072~glycerol-3-phosphate metabolic process,G  
GO:0007141~male meiosis I,GO:0007283~spermatogenesis,GO:0007288~sperm axoneme assembly,G  
GO:0006520~cellular amino acid metabolic process,GO:0007005~mitochondrion organization,GO:00072

GO:0006457~protein folding,GO:0006508~proteolysis,  
GO:0006812~cation transport,GO:0006813~potassium ion transport,GO:0006814~sodium ion transport,  
GO:0006508~proteolysis,  
GO:0001731~formation of translation preinitiation complex,GO:0006413~translational initiation,GO:0006  
GO:0055114~oxidation-reduction process,  
GO:0001731~formation of translation preinitiation complex,GO:0006413~translational initiation,GO:0006

GO:0006096~glycolytic process,  
GO:0006171~cAMP biosynthetic process,GO:0007189~adenylate cyclase-activating G-protein coupled r  
GO:0006909~phagocytosis,GO:0016579~protein deubiquitination,  
GO:0006812~cation transport,GO:0006874~cellular calcium ion homeostasis,  
GO:0009966~regulation of signal transduction,GO:0043666~regulation of phosphoprotein phosphatase ;  
GO:0008535~respiratory chain complex IV assembly,GO:0051205~protein insertion into membrane,  
GO:0016579~protein deubiquitination,  
GO:0006461~protein complex assembly,GO:0006508~proteolysis,GO:0008053~mitochondrial fusion,G  
GO:0006560~proline metabolic process,GO:0055114~oxidation-reduction process,  
GO:0006094~gluconeogenesis,GO:0006096~glycolytic process,GO:0019233~sensory perception of pain

GO:0006468~protein phosphorylation,GO:0006909~phagocytosis,GO:0008360~regulation of cell shape,  
GO:0006458~'de novo' protein folding,GO:0006626~protein targeting to mitochondrion,GO:0007283~sp  
GO:0006814~sodium ion transport,GO:0055085~transmembrane transport,GO:0071422~succinate tran  
GO:0007264~small GTPase mediated signal transduction,GO:0008360~regulation of cell shape,GO:004  
GO:0008152~metabolic process,GO:0042742~defense response to bacterium,  
GO:0006417~regulation of translation,  
GO:0000413~protein peptidyl-prolyl isomerization,GO:0006457~protein folding,

GO:0007165~signal transduction,GO:0007411~axon guidance,GO:0007432~salivary gland boundary sp  
GO:0006298~mismatch repair,  
GO:0006024~glycosaminoglycan biosynthetic process,GO:0006044~N-acetylglucosamine metabolic pro  
GO:0019233~sensory perception of pain,  
GO:0006343~establishment of chromatin silencing,GO:0016573~histone acetylation,GO:0048477~ooge  
GO:0006465~signal peptide processing,GO:0006627~protein processing involved in protein targeting to  
GO:0006820~anion transport,GO:0055085~transmembrane transport,  
GO:0016567~protein ubiquitination,GO:0031146~SCF-dependent proteasomal ubiquitin-dependent prot  
GO:0006526~arginine biosynthetic process,GO:0042450~arginine biosynthetic process via ornithine,GO

GO:0006355~regulation of transcription, DNA-templated,GO:0006366~transcription from RNA polymera  
GO:0006458~'de novo' protein folding,GO:0006986~response to unfolded protein,GO:0051085~chaperc  
GO:0000122~negative regulation of transcription from RNA polymerase II promoter,GO:0000281~mitotic  
GO:0007391~dorsal closure,GO:0035848~oviduct morphogenesis,GO:0048621~post-embryonic digesti  
GO:0006511~ubiquitin-dependent protein catabolic process,GO:0007095~mitotic G2 DNA damage chec  
GO:0001745~compound eye morphogenesis,GO:0006511~ubiquitin-dependent protein catabolic proces  
GO:0055114~oxidation-reduction process,  
GO:0018063~cytochrome c-heme linkage,  
GO:0000278~mitotic cell cycle,GO:0006123~mitochondrial electron transport, cytochrome c to oxygen,G  
GO:0007059~chromosome segregation,GO:0030261~chromosome condensation,GO:0031507~heteroc  
GO:0007186~G-protein coupled receptor signaling pathway,GO:0007213~G-protein coupled acetylcholin  
GO:0050832~defense response to fungus,  
GO:0016063~rhodopsin biosynthetic process,GO:0034975~protein folding in endoplasmic reticulum,GO  
GO:0000160~phosphorelay signal transduction system,GO:0006813~potassium ion transport,GO:00109  
GO:0000122~negative regulation of transcription from RNA polymerase II promoter,GO:0006351~transc  
GO:0006096~glycolytic process,GO:0010906~regulation of glucose metabolic process,  
GO:0006468~protein phosphorylation,GO:0007169~transmembrane receptor protein tyrosine kinase sig  
GO:0000059~protein import into nucleus, docking,GO:0000060~protein import into nucleus, translocatio  
GO:0007160~cell-matrix adhesion,GO:0048738~cardiac muscle tissue development,GO:0050829~defer  
GO:0006909~phagocytosis,GO:0030041~actin filament polymerization,GO:0045010~actin nucleation,GO  
GO:0006260~DNA replication,GO:0006281~DNA repair,GO:0006351~transcription, DNA-templated,GO  
GO:0006424~glutamyl-tRNA aminoacylation,GO:0006433~prolyl-tRNA aminoacylation,  
GO:0006458~'de novo' protein folding,GO:0006626~protein targeting to mitochondrion,GO:0007286~sp  
GO:0006458~'de novo' protein folding,GO:0006626~protein targeting to mitochondrion,GO:0007005~mi  
GO:0006457~protein folding,  
GO:0000381~regulation of alternative mRNA splicing, via spliceosome,GO:0001745~compound eye mor  
GO:0006333~chromatin assembly or disassembly,GO:0006334~nucleosome assembly,GO:0006352~DI  
GO:0006468~protein phosphorylation,GO:0008586~imaginal disc-derived wing vein morphogenesis,GO

GO:0006814~sodium ion transport,GO:0006848~pyruvate transport,GO:0008340~determination of adult sex,GO:0005975~carbohydrate metabolic process,GO:0006032~chitin catabolic process,GO:0007444~imaginal disc development

GO:0000723~telomere maintenance,GO:0006325~chromatin organization,GO:0006351~transcription, DNA-templated,GO:0006621~protein retention in ER lumen,GO:0006890~retrograde vesicle-mediated transport, Golgi to cytosol,GO:0000070~mitotic sister chromatid segregation,GO:0007018~microtubule-based movement,GO:0007019~mitochondrion inheritance,GO:0007053~spindle assembly involved in male meiosis,GO:0007054~spermatid nucleus elongation,GO:0035092~sperm chromatin condensation,GO:0035093~oxidation-reduction process,GO:0006108~malate metabolic process,GO:0055114~oxidation-reduction process,GO:0000226~microtubule cytoskeleton organization,GO:0007005~mitochondrion organization,GO:0007015~actin filament organization,GO:0007411~axon guidance,GO:0007526~larval somatic muscle development,GO:0006997~nucleus organization,GO:0007015~actin filament organization,GO:0007303~cytoplasmic transport

GO:0006338~chromatin remodeling,GO:0035041~sperm chromatin decondensation,GO:0006355~regulation of transcription, DNA-templated,GO:0007186~G-protein coupled receptor signaling pathway,GO:0007608~sensory perception of smell,GO:0007619~courtship behavior,GO:0019236~response to physical contact,GO:0002121~inter-male aggressive behavior,GO:0007606~sensory perception of chemical stimulus,GO:0000266~mitochondrial fission,GO:0000422~mitophagy,GO:0006468~protein phosphorylation,GO:0005975~carbohydrate metabolic process,GO:0006164~purine nucleotide biosynthetic process,GO:0006189~'de novo' IMP biosynthetic process,GO:0006468~protein phosphorylation

GO:0006897~endocytosis,GO:0007291~sperm individualization,GO:0007474~imaginal disc-derived wing morphogenesis,GO:0006511~ubiquitin-dependent protein catabolic process,GO:0022008~neurogenesis,GO:0043161~proteasome-mediated ubiquitin-dependent protein catabolic process,GO:0006974~cellular response to DNA damage stimulus,GO:0030433~ER-associated ubiquitin-dependent protein catabolic process,GO:0006810~transport,GO:0006869~lipid transport,GO:0007224~smoothed signaling pathway,GO:0003501~melanotic encapsulation of foreign target,GO:0035023~regulation of Rho protein signal transduction

GO:0006468~protein phosphorylation,GO:0007268~chemical synaptic transmission,GO:0042742~defense response,GO:0007608~sensory perception of smell,GO:0006465~signal peptide processing,GO:0045047~protein targeting to ER,GO:0006508~proteolysis,GO:0006508~proteolysis,GO:0006508~proteolysis,GO:0007498~mesoderm development,GO:0006508~proteolysis,GO:0032504~multicellular organism reproduction,GO:0006508~proteolysis,GO:0006469~negative regulation of protein kinase activity,GO:0019221~cytokine-mediated signaling pathway,GO:0006367~transcription initiation from RNA polymerase II promoter,GO:0000209~protein polyubiquitination,GO:0007418~ventral midline development,GO:0016567~protein polyubiquitination,GO:0006909~phagocytosis,GO:0050829~defense response to Gram-negative bacterium,GO:0006626~protein targeting to mitochondrion,GO:0030150~protein import into mitochondrial matrix,GO:0006626~protein targeting to mitochondrion,GO:0030150~protein import into mitochondrial matrix,GO:0006626~protein targeting to mitochondrion,GO:0000209~protein polyubiquitination,GO:0006914~autophagy,GO:0008283~cell proliferation,GO:0006511~ubiquitin-dependent protein catabolic process,GO:0008587~imaginal disc-derived wing morphogenesis,GO:0006308~DNA catabolic process,GO:0035074~pupation,

GO:0007548~sex differentiation,  
GO:0007264~small GTPase mediated signal transduction,GO:0035023~regulation of Rho protein signal  
GO:0007158~neuron cell-cell adhesion,GO:0007416~synapse assembly,GO:0050804~modulation of sy  
GO:0001751~compound eye photoreceptor cell differentiation,GO:0001754~eye photoreceptor cell diffe

GO:0007017~microtubule-based process,GO:0007435~salivary gland morphogenesis,  
GO:0006325~chromatin organization,GO:0007411~axon guidance,GO:0007422~peripheral nervous sys  
GO:0007165~signal transduction,GO:0007186~G-protein coupled receptor signaling pathway,GO:00071  
GO:0022008~neurogenesis,GO:0042753~positive regulation of circadian rhythm,GO:0042787~protein u  
GO:0000281~mitotic cytokinesis,GO:0000915~actomyosin contractile ring assembly,GO:0003383~apica  
GO:0006887~exocytosis,GO:0007224~smoothened signaling pathway,GO:0007275~multicellular organi

GO:0002009~morphogenesis of an epithelium,GO:0002121~inter-male aggressive behavior,GO:000715  
GO:0000082~G1/S transition of mitotic cell cycle,GO:0007140~male meiosis,GO:0007283~spermatoger  
GO:0000902~cell morphogenesis,GO:0002064~epithelial cell development,GO:0006909~phagocytosis,(  
GO:0000184~nuclear-transcribed mRNA catabolic process, nonsense-mediated decay,GO:0001700~err  
GO:0007274~neuromuscular synaptic transmission,GO:0007391~dorsal closure,GO:0007419~ventral c  
GO:0000398~mRNA splicing, via spliceosome,GO:0006397~mRNA processing,GO:0006974~cellular re  
GO:0000209~protein polyubiquitination,GO:0007112~male meiosis cytokinesis,GO:0007283~spermatog  
GO:0005975~carbohydrate metabolic process,GO:0006099~tricarboxylic acid cycle,GO:0006101~citrate  
GO:0006260~DNA replication,GO:0006267~pre-replicative complex assembly involved in nuclear cell cy  
GO:0003341~cilium movement,  
GO:0007155~cell adhesion,GO:0007409~axonogenesis,GO:0030198~extracellular matrix organization,(  
GO:0000209~protein polyubiquitination,GO:0007520~myoblast fusion,GO:0046716~muscle cell cellular  
GO:0007009~plasma membrane organization,GO:0008654~phospholipid biosynthetic process,GO:0034  
GO:0000132~establishment of mitotic spindle orientation,GO:0007058~spindle assembly involved in ferr  
GO:0006811~ion transport,GO:0006816~calcium ion transport,GO:0008344~adult locomotory behavior,(  
GO:0000398~mRNA splicing, via spliceosome,GO:0006355~regulation of transcription, DNA-templated,(  
GO:0006919~activation of cysteine-type endopeptidase activity involved in apoptotic process,GO:000729  
GO:0035971~peptidyl-histidine dephosphorylation,  
GO:0022008~neurogenesis,GO:0034472~snRNA 3'-end processing,  
GO:0006342~chromatin silencing,GO:0006357~regulation of transcription from RNA polymerase II prom  
GO:0000122~negative regulation of transcription from RNA polymerase II promoter,GO:0030381~chorio

GO:0000226~microtubule cytoskeleton organization,GO:0001578~microtubule bundle formation,GO:000  
GO:0007015~actin filament organization,GO:0007409~axonogenesis,GO:0007602~phototransduction,G  
GO:0007000~nucleolus organization,GO:0007275~multicellular organism development,  
GO:0000278~mitotic cell cycle,GO:0000902~cell morphogenesis,GO:0006470~protein dephosphorylati  
GO:0007605~sensory perception of sound,GO:0016059~deactivation of rhodopsin mediated signaling,G  
GO:0006508~proteolysis,GO:0007399~nervous system development,GO:0007601~visual perception,GO  
GO:0006397~mRNA processing,GO:0007411~axon guidance,GO:0008340~determination of adult lifespe  
GO:0001745~compound eye morphogenesis,GO:0007155~cell adhesion,GO:0007156~homophilic cell a  
GO:0030036~actin cytoskeleton organization,GO:0035023~regulation of Rho protein signal transduction  
GO:0007476~imaginal disc-derived wing morphogenesis,GO:0030707~ovarian follicle cell development,

**GOTERM\_CC\_DIRECT**

GO:0005622~intracellular,GO:0005794~Golgi apparatus,GO:0098793~presynapse,  
GO:0005737~cytoplasm,GO:0005811~lipid particle,GO:0005829~cytosol,GO:00093  
GO:0005576~extracellular region,GO:0005615~extracellular space,  
GO:0005680~anaphase-promoting complex,  
GO:0005623~cell,GO:0005739~mitochondrion,GO:0005758~mitochondrial intermembrane  
GO:0016272~prefoldin complex,  
GO:0005634~nucleus,  
GO:0005789~endoplasmic reticulum membrane,GO:0031090~organelle membrane  
GO:0005634~nucleus,GO:0005737~cytoplasm,  
GO:0005829~cytosol,  
GO:0016021~integral component of membrane,  
GO:0000151~ubiquitin ligase complex,GO:0005737~cytoplasm,GO:0005886~plasma

GO:0016021~integral component of membrane,  
GO:0005929~cilium,GO:0072372~primary cilium,GO:0097542~ciliary tip,  
GO:0016021~integral component of membrane,  
GO:0005789~endoplasmic reticulum membrane,GO:0016021~integral component of membrane  
GO:0005739~mitochondrion,GO:0005856~cytoskeleton,  
GO:0016021~integral component of membrane,  
GO:0034399~nuclear periphery,  
GO:0016021~integral component of membrane,

GO:0016021~integral component of membrane,  
GO:0005742~mitochondrial outer membrane translocase complex,GO:0031307~integral component of membrane

GO:0016021~integral component of membrane,

GO:0005737~cytoplasm,

GO:0005739~mitochondrion,GO:0005829~cytosol,  
GO:0016021~integral component of membrane,  
GO:0016021~integral component of membrane,  
GO:0005615~extracellular space,  
GO:0005739~mitochondrion,GO:0005741~mitochondrial outer membrane,  
GO:0005741~mitochondrial outer membrane,  
GO:0005741~mitochondrial outer membrane,  
GO:0005622~intracellular,GO:0005886~plasma membrane,GO:0016021~integral component of membrane

GO:0000776~kinetochore,GO:0000922~spindle pole,GO:0005634~nucleus,GO:0005730~nucleolus,GO:0032040~small-subunit processome,



GO:0017086~3-methyl-2-oxobutanoate dehydrogenase (lipoamide) complex,

GO:0005622~intracellular,

GO:0016021~integral component of membrane,

GO:0005737~cytoplasm,GO:0005829~cytosol,GO:0030014~CCR4-NOT complex,

GO:0005634~nucleus,

GO:0016020~membrane,GO:0016021~integral component of membrane,

GO:0005813~centrosome,GO:0016021~integral component of membrane,

GO:0016021~integral component of membrane,

GO:0016319~mushroom body development,

GO:0005887~integral component of plasma membrane,GO:0016020~membrane,GO:

GO:0016021~integral component of membrane,

GO:0016021~integral component of membrane,

GO:0016021~integral component of membrane,

GO:0000932~cytoplasmic mRNA processing body,GO:0005737~cytoplasm,GO:003

GO:0005623~cell,GO:0005743~mitochondrial inner membrane,GO:0016021~integr

GO:0016021~integral component of membrane,

GO:0031235~intrinsic component of the cytoplasmic side of the plasma membrane,

GO:0005856~cytoskeleton,

GO:0005615~extracellular space,

GO:0005829~cytosol,GO:0009331~glycerol-3-phosphate dehydrogenase complex,

GO:0005634~nucleus,GO:0005737~cytoplasm,GO:0005829~cytosol,GO:0030054~

GO:0005739~mitochondrion,GO:0005759~mitochondrial matrix,

GO:0016021~integral component of membrane,

GO:0005739~mitochondrion,

GO:0005886~plasma membrane,GO:0005887~integral component of plasma mem

GO:0005737~cytoplasm,

GO:0005852~eukaryotic translation initiation factor 3 complex,GO:0016282~eukary

GO:0005739~mitochondrion,GO:0005829~cytosol,GO:0005852~eukaryotic translati

GO:0005622~intracellular,GO:0005886~plasma membrane,GO:0016021~integral c

GO:0005887~integral component of plasma membrane,GO:0012505~endomembra

GO:0000164~protein phosphatase type 1 complex,

GO:0005740~mitochondrial envelope,GO:0016021~integral component of membran

GO:0005739~mitochondrion,GO:0005743~mitochondrial inner membrane,GO:0016

GO:0005759~mitochondrial matrix,

GO:0005829~cytosol,

GO:0005634~nucleus,GO:0005737~cytoplasm,  
GO:0005759~mitochondrial matrix,  
GO:0005887~integral component of plasma membrane,GO:0016020~membrane,  
GO:0005622~intracellular,

GO:0005737~cytoplasm,

GO:0012505~endomembrane system,  
GO:0016021~integral component of membrane,  
GO:0005875~microtubule associated complex,GO:0032300~mismatch repair complex,  
GO:0000139~Golgi membrane,GO:0005783~endoplasmic reticulum,GO:0005789~endoplasmic reticulum membrane,

GO:0005634~nucleus,GO:0005700~polytene chromosome,GO:0035327~transcription factor complex,  
GO:0005743~mitochondrial inner membrane,GO:0016021~integral component of membrane,  
GO:0005886~plasma membrane,GO:0016021~integral component of membrane,  
GO:0005737~cytoplasm,GO:0019005~SCF ubiquitin ligase complex,  
GO:0005829~cytosol,  
GO:0016021~integral component of membrane,  
GO:0000137~Golgi cis cisterna,  
GO:0005634~nucleus,GO:0005829~cytosol,  
GO:0005759~mitochondrial matrix,  
GO:0005634~nucleus,GO:0005667~transcription factor complex,GO:0005700~polytene chromosome,  
GO:0005581~collagen trimer,GO:0005587~collagen type IV trimer,  
GO:0005634~nucleus,GO:0005737~cytoplasm,GO:0019005~SCF ubiquitin ligase complex,  
GO:0005737~cytoplasm,GO:0031463~Cul3-RING ubiquitin ligase complex,GO:0005789~endoplasmic reticulum membrane,GO:0005811~lipid particle,GO:0019005~SCF ubiquitin ligase complex,  
GO:0005739~mitochondrion,GO:0005743~mitochondrial inner membrane,  
GO:0005739~mitochondrion,GO:0005751~mitochondrial respiratory chain complex,  
GO:0000792~heterochromatin,GO:0005634~nucleus,GO:0005701~polytene chromosome,  
GO:0005887~integral component of plasma membrane,GO:0016021~integral component of membrane,  
GO:0005576~extracellular region,  
GO:0005783~endoplasmic reticulum,GO:0012505~endomembrane system,GO:0016021~integral component of membrane,  
GO:0005622~intracellular,GO:0005887~integral component of plasma membrane,GO:0005634~nucleus,  
GO:0000015~phosphopyruvate hydratase complex,GO:0005737~cytoplasm,GO:0005886~plasma membrane,GO:0005912~adherens junction,GO:0019898~extracellular matrix,  
GO:0005622~intracellular,GO:0005635~nuclear envelope,GO:0005643~nuclear pore complex,GO:0005737~cytoplasm,  
GO:0005576~extracellular region,GO:0005829~cytosol,GO:0005884~actin filament,  
GO:0005634~nucleus,GO:0005663~DNA replication factor C complex,GO:0005875~microtubule associated complex,  
GO:0005737~cytoplasm,GO:0017101~aminoacyl-tRNA synthetase multienzyme complex,GO:0005759~mitochondrial matrix,  
GO:0005737~cytoplasm,GO:0005739~mitochondrion,GO:0005743~mitochondrial inner membrane,GO:0005739~mitochondrion,  
GO:0005634~nucleus,GO:0005703~polytene chromosome puff,GO:0019013~viral replication complex,GO:0000228~nuclear chromosome,GO:0000786~nucleosome,GO:0005634~nucleus,  
GO:0005634~nucleus,

GO:0005887~integral component of plasma membrane,  
GO:0005576~extracellular region,

GO:0000228~nuclear chromosome,GO:0000790~nuclear chromatin,GO:0005634~r  
GO:0005783~endoplasmic reticulum,GO:0005789~endoplasmic reticulum membrar  
GO:0000776~kinetochore,GO:0005634~nucleus,GO:0005737~cytoplasm,GO:0005737~  
GO:0005737~cytoplasm,GO:0005739~mitochondrion,GO:0005829~cytosol,  
GO:0000785~chromatin,GO:0005634~nucleus,GO:0005874~microtubule,GO:00361  
GO:0016021~integral component of membrane,

GO:0031307~integral component of mitochondrial outer membrane,  
GO:0005829~cytosol,GO:0005886~plasma membrane,GO:0043195~terminal boutc  
GO:0005635~nuclear envelope,GO:0005640~nuclear outer membrane,GO:0005737~  
GO:0005737~cytoplasm,GO:0005875~microtubule associated complex,  
GO:0005634~nucleus,GO:0005737~cytoplasm,  
GO:0005887~integral component of plasma membrane,GO:0016021~integral comp  
GO:0005886~plasma membrane,GO:0005929~cilium,GO:0016021~integral compo  
GO:0005576~extracellular region,  
GO:0005737~cytoplasm,GO:0005739~mitochondrion,GO:0016006~Nebenkern,  
GO:0005829~cytosol,  
O:0006541~glutamine metabolic process,GO:0008340~determination of adult lifespr

GO:0071212~subsynaptic reticulum,  
GO:0005634~nucleus,GO:0005737~cytoplasm,GO:0008541~proteasome regulator  
GO:0000502~proteasome complex,GO:0005838~proteasome regulatory particle,GC  
GO:0005700~polytene chromosome,GO:0005737~cytoplasm,GO:0005838~proteas  
GO:0005576~extracellular region,GO:0005615~extracellular space,GO:0005811~lip  
induction,  
GO:0005576~extracellular region,  
GO:0048786~presynaptic active zone,

GO:0005787~signal peptidase complex,GO:0016021~integral component of membr  
GO:0005737~cytoplasm,  
GO:0005737~cytoplasm,  
GO:0005737~cytoplasm,  
GO:0005615~extracellular space,GO:0005737~cytoplasm,  
GO:0005737~cytoplasm,  
GO:0005737~cytoplasm,  
GO:0001673~male germ cell nucleus,GO:0005669~transcription factor TFIID compl  
GO:0005783~endoplasmic reticulum,GO:0005789~endoplasmic reticulum membrar  
GO:0005615~extracellular space,  
GO:0005744~mitochondrial inner membrane presequence translocase complex,GO  
GO:0005742~mitochondrial outer membrane translocase complex,GO:0031307~inte  
GO:0005742~mitochondrial outer membrane translocase complex,  
GO:0005634~nucleus,GO:0005829~cytosol,GO:0005886~plasma membrane,GO:0  
GO:0005737~cytoplasm,

GO:0005576~extracellular region,GO:0005811~lipid particle,GO:0005875~microtub  
GO:0005622~intracellular,  
GO:0005887~integral component of plasma membrane,GO:0009986~cell surface,G  
GO:0005737~cytoplasm,GO:0005886~plasma membrane,  
GO:0005739~mitochondrion,  
GO:0005737~cytoplasm,GO:0005874~microtubule,  
GO:0000790~nuclear chromatin,GO:0005634~nucleus,  
GO:0005771~multivesicular body,GO:0005887~integral component of plasma mem  
GO:0005634~nucleus,GO:0005737~cytoplasm,  
GO:0005737~cytoplasm,GO:0005856~cytoskeleton,GO:0005884~actin filament,GC  
GO:0016020~membrane,GO:0016021~integral component of membrane,  
GO:0005634~nucleus,GO:0016007~mitochondrial derivative,GO:0036126~sperm fl  
GO:0005886~plasma membrane,GO:0005912~adherens junction,GO:0005913~cell  
esis,GO:0008315~meiotic G2/M1 transition,GO:0035071~salivary gland cell autoph  
GO:0000137~Golgi cis cisterna,GO:0005801~cis-Golgi network,GO:0005802~trans  
GO:0000932~cytoplasmic mRNA processing body,  
GO:0005576~extracellular region,GO:0005615~extracellular space,GO:0012505~er  
GO:0005634~nucleus,GO:0005737~cytoplasm,GO:0005829~cytosol,GO:0030529~  
GO:0005634~nucleus,GO:0005737~cytoplasm,  
GO:0005739~mitochondrion,GO:0005759~mitochondrial matrix,GO:0005875~micro  
GO:0000784~nuclear chromosome, telomeric region,GO:0005656~nuclear pre-repli  
GO:0016021~integral component of membrane,GO:0030286~dynein complex,GO:0  
GO:0005578~proteinaceous extracellular matrix,GO:0005615~extracellular space,G  
GO:0005737~cytoplasm,GO:0030018~Z disc,GO:0031430~M band,  
GO:0005739~mitochondrion,GO:0005741~mitochondrial outer membrane,GO:0005  
GO:0005813~centrosome,GO:0005819~spindle,GO:0005875~microtubule associat  
GO:0005886~plasma membrane,GO:0016020~membrane,GO:0016021~integral co  
GO:0005634~nucleus,GO:0071011~precatalytic spliceosome,GO:0071013~catalytic  
GO:0005737~cytoplasm,GO:0019005~SCF ubiquitin ligase complex,  
GO:0005634~nucleus,GO:0005829~cytosol,  
GO:0032039~integrator complex,  
GO:0005634~nucleus,GO:0031519~PcG protein complex,  
GO:0000785~chromatin,GO:0000792~heterochromatin,GO:0005634~nucleus,

GO:0000235~astral microtubule,GO:0005737~cytoplasm,GO:0005856~cytoskeleton  
GO:0045087~innate immune response,GO:0045494~photoreceptor cell maintenance,  
GO:0005634~nucleus,GO:0005730~nucleolus,GO:0005819~spindle,GO:0005875~r  
GO:0005737~cytoplasm,GO:0005856~cytoskeleton,GO:0045177~apical part of cell  
GO:0005622~intracellular,  
GO:0005622~intracellular,GO:0005737~cytoplasm,  
GO:0005654~nucleoplasm,  
GO:0005886~plasma membrane,GO:0005917~nephrocyte diaphragm,GO:0016021  
GO:0005622~intracellular,GO:0030054~cell junction,GO:0045202~synapse,  
GO:0000922~spindle pole,GO:0005634~nucleus,GO:0005813~centrosome,GO:000

**GOTERM\_MF\_DIRECT**

GO:0003956~NAD(P)+-protein-arginine ADP-ribosyltransferase activity,GO:0005525~GTP binding,  
GO:0003878~ATP citrate synthase activity,GO:0005524~ATP binding,GO:0016829~lyase activity,GO:00042802~identical protein binding,  
GO:0004842~ubiquitin-protein transferase activity,  
GO:0003677~DNA binding,GO:0016491~oxidoreductase activity,GO:0046983~protein dimerization activ

GO:0003684~damaged DNA binding,  
GO:0004497~monooxygenase activity,GO:0005506~iron ion binding,GO:0016705~oxidoreductase activi  
GO:0004672~protein kinase activity,GO:0004674~protein serine/threonine kinase activity,GO:0005524~,  
GO:0008477~purine nucleosidase activity,

GO:0031624~ubiquitin conjugating enzyme binding,GO:0032182~ubiquitin-like protein binding,GO:00971  
GO:0004252~serine-type endopeptidase activity,GO:0016787~hydrolase activity,

GO:0016740~transferase activity,GO:0051377~mannose-ethanolamine phosphotransferase activity,  
GO:0019894~kinesin binding,  
GO:0016747~transferase activity, transferring acyl groups other than amino-acyl groups,

GO:0004222~metalloendopeptidase activity,

GO:0015450~P-P-bond-hydrolysis-driven protein transmembrane transporter activity,GO:0030943~mitoc  
GO:0005509~calcium ion binding,

GO:0003676~nucleic acid binding,GO:0046872~metal ion binding,  
GO:0004867~serine-type endopeptidase inhibitor activity,  
GO:0005524~ATP binding,GO:0019205~nucleobase-containing compound kinase activity,

GO:0004252~serine-type endopeptidase activity,GO:0016787~hydrolase activity,  
GO:0003824~catalytic activity,GO:0004021~L-alanine:2-oxoglutarate aminotransferase activity,GO:0030

GO:0004806~triglyceride lipase activity,GO:0016298~lipase activity,GO:0016788~hydrolase activity, acti  
GO:0005261~cation channel activity,GO:0008308~voltage-gated anion channel activity,GO:0015288~po  
GO:0015267~channel activity,  
GO:0015267~channel activity,  
GO:0004016~adenylate cyclase activity,GO:0016849~phosphorus-oxygen lyase activity,

GO:0005635~nuclear envelope,GO:0005643~nuclear pore,GO:0005654~nucleoplasm,GO:0005737~cytoplasm,  
GO:0070181~small ribosomal subunit rRNA binding,

GO:0003863~3-methyl-2-oxobutanoate dehydrogenase (2-methylpropanoyl-transferring) activity,  
GO:0008168~methyltransferase activity,GO:0008175~tRNA methyltransferase activity,  
GO:0003924~GTPase activity,GO:0005525~GTP binding,  
GO:0008757~S-adenosylmethionine-dependent methyltransferase activity,GO:0019899~enzyme binding

GO:0004535~poly(A)-specific ribonuclease activity,GO:0005515~protein binding,  
GO:0003676~nucleic acid binding,GO:0008270~zinc ion binding,  
GO:0005524~ATP binding,GO:0016887~ATPase activity,

GO:0015171~amino acid transmembrane transporter activity,  
GO:0004176~ATP-dependent peptidase activity,GO:0008270~zinc ion binding,

GO:0005215~transporter activity,GO:0015137~citrate transmembrane transporter activity,GO:0015141~:

GO:0004535~poly(A)-specific ribonuclease activity,GO:0005515~protein binding,GO:0032947~protein c  
GO:0003735~structural constituent of ribosome,GO:0005476~carnitine:acyl carnitine antiporter activity,G  
GO:0004806~triglyceride lipase activity,GO:0016788~hydrolase activity, acting on ester bonds,  
GO:0008757~S-adenosylmethionine-dependent methyltransferase activity,GO:0051998~protein carboxy

GO:0000166~nucleotide binding,GO:0003676~nucleic acid binding,GO:0003729~mRNA binding,  
GO:0005096~GTPase activator activity,

GO:0004867~serine-type endopeptidase inhibitor activity,

GO:0004367~glycerol-3-phosphate dehydrogenase [NAD+] activity,GO:0042803~protein homodimerizat  
GO:0000166~nucleotide binding,GO:0000900~translation repressor activity, nucleic acid binding,GO:000  
GO:0004352~glutamate dehydrogenase (NAD+) activity,GO:0004353~glutamate dehydrogenase [NAD(I

GO:0004252~serine-type endopeptidase activity,GO:0005524~ATP binding,GO:0016787~hydrolase acti  
GO:0005391~sodium:potassium-exchanging ATPase activity,GO:0005524~ATP binding,GO:0046872~nr  
GO:0004177~aminopeptidase activity,GO:0008235~metalloexopeptidase activity,GO:0030145~mangan  
GO:0003743~translation initiation factor activity,  
GO:0003939~L-iditol 2-dehydrogenase activity,GO:0008270~zinc ion binding,GO:0016491~oxidoreducta  
GO:0003743~translation initiation factor activity,GO:0031369~translation initiation factor binding,  
GO:0004092~carnitine O-acetyltransferase activity,GO:0016746~transferase activity, transferring acyl gr  
GO:0004332~fructose-bisphosphate aldolase activity,  
GO:0004016~adenylate cyclase activity,GO:0016849~phosphorus-oxygen lyase activity,  
GO:0004843~thiol-dependent ubiquitin-specific protease activity,  
GO:0000166~nucleotide binding,GO:0005524~ATP binding,GO:0016887~ATPase activity,GO:0019829-  
GO:0004864~protein phosphatase inhibitor activity,

ie,

GO:0004176~ATP-dependent peptidase activity,GO:0004222~metalloendopeptidase activity,GO:000552  
GO:0003842~1-pyrroline-5-carboxylate dehydrogenase activity,GO:0004029~aldehyde dehydrogenase (  
GO:0004082~bisphosphoglycerate mutase activity,GO:0004083~bisphosphoglycerate 2-phosphatase ac

GO:0004672~protein kinase activity,GO:0004674~protein serine/threonine kinase activity,GO:0005524~  
GO:0005524~ATP binding,  
GO:0005215~transporter activity,GO:0015137~citrate transmembrane transporter activity,GO:0015141~  
GO:0005088~Ras guanyl-nucleotide exchange factor activity,  
GO:0003943~N-acetylgalactosamine-4-sulfatase activity,GO:0008484~sulfuric ester hydrolase activity,  
GO:0003743~translation initiation factor activity,  
GO:0003755~peptidyl-prolyl cis-trans isomerase activity,

GO:0005043~netrin receptor activity involved in chemorepulsion,  
GO:0003697~single-stranded DNA binding,GO:0005524~ATP binding,GO:0016887~ATPase activity,GC  
GO:0005515~protein binding,GO:0008375~acetylglucosaminyltransferase activity,GO:0015020~glucuro  
GO:0005524~ATP binding,GO:0016887~ATPase activity,  
GO:0001047~core promoter binding,GO:0008168~methyltransferase activity,GO:0008270~zinc ion bindi  
GO:0004252~serine-type endopeptidase activity,GO:0008236~serine-type peptidase activity,  
GO:0005436~sodium:phosphate symporter activity,GO:0022857~transmembrane transporter activity,  
GO:0004842~ubiquitin-protein transferase activity,  
GO:0004056~argininosuccinate lyase activity,

GO:0017137~Rab GTPase binding,  
GO:0003676~nucleic acid binding,GO:0003700~transcription factor activity, sequence-specific DNA bind  
GO:0046872~metal ion binding,GO:0051082~unfolded protein binding,GO:0051087~chaperone binding,  
GO:0005515~protein binding,GO:0018024~histone-lysine N-methyltransferase activity,GO:0031491~nuc  
GO:0005201~extracellular matrix structural constituent,  
GO:0031625~ubiquitin protein ligase binding,  
GO:0004842~ubiquitin-protein transferase activity,GO:0031625~ubiquitin protein ligase binding,  
GO:0003958~NADPH-hemoprotein reductase activity,GO:0010181~FMN binding,GO:0030586~[methion  
GO:0004408~holocytochrome-c synthase activity,  
GO:0004129~cytochrome-c oxidase activity,  
GO:0003696~satellite DNA binding,GO:0003697~single-stranded DNA binding,GO:0003730~mRNA 3'-L  
GO:0001588~dopamine neurotransmitter receptor activity, coupled via Gs,GO:0008227~G-protein coupl

6020~membrane,GO:0072546~ER membrane protein complex,  
GO:0000155~phosphorelay sensor kinase activity,GO:0005249~voltage-gated potassium channel activit  
GO:0003677~DNA binding,GO:0003700~transcription factor activity, sequence-specific DNA binding,GC  
GO:0000287~magnesium ion binding,GO:0004634~phosphopyruvate hydratase activity,  
GO:0004713~protein tyrosine kinase activity,GO:0004715~non-membrane spanning protein tyrosine kin  
GO:0008139~nuclear localization sequence binding,GO:0008320~protein transmembrane transporter ac  
GO:0050839~cell adhesion molecule binding,  
GO:0003779~actin binding,GO:0005509~calcium ion binding,  
GO:0003677~DNA binding,GO:0003689~DNA clamp loader activity,GO:0005524~ATP binding,  
GO:0003723~RNA binding,GO:0004818~glutamate-tRNA ligase activity,GO:0004827~proline-tRNA ligas  
GO:0005524~ATP binding,GO:0051082~unfolded protein binding,  
GO:0005524~ATP binding,GO:0051082~unfolded protein binding,  
GO:0005524~ATP binding,GO:0051082~unfolded protein binding,  
GO:0000166~nucleotide binding,GO:0003676~nucleic acid binding,GO:0003729~mRNA binding,GO:004  
GO:0003677~DNA binding,GO:0046982~protein heterodimerization activity,  
GO:0003677~DNA binding,GO:0004672~protein kinase activity,GO:0004674~protein serine/threonine ki

GO:0015137~citrate transmembrane transporter activity,GO:0015141~succinate transmembrane transporter activity,GO:0004568~chitinase activity,GO:0008061~chitin binding,GO:0008084~imaginal disc growth factor receptor activity,GO:0008157~protein phosphatase 1 binding,  
 GO:0004674~protein serine/threonine kinase activity,GO:0005524~ATP binding,GO:0035175~histone kinase activity,GO:0005046~KDEL sequence binding,  
 GO:0003774~motor activity,GO:0003777~microtubule motor activity,GO:0005524~ATP binding,GO:0003723~RNA binding,  
 l26~sperm flagellum,  
 GO:0004471~malate dehydrogenase (decarboxylating) (NAD+) activity,GO:0046872~metal ion binding,GO:0004471~malate dehydrogenase (decarboxylating) (NAD+) activity,GO:0004473~malate dehydrogenase (decarboxylating) (NAD+) activity,GO:0000287~magnesium ion binding,GO:0003924~GTPase activity,GO:0005509~calcium ion binding,GO:0003779~actin binding,GO:0008270~zinc ion binding,GO:0016491~oxidoreductase activity,GO:0003779~actin binding,GO:0005515~protein binding,GO:0008092~cytoskeletal protein binding,GO:0008157~protein phosphatase 1 binding,  
 GO:0042393~histone binding,  
 GO:0003700~transcription factor activity, sequence-specific DNA binding,GO:0004930~G-protein coupled receptor activity,GO:0004984~olfactory receptor activity,GO:0005549~odorant binding,GO:0016503~pheromone receptor activity,GO:0005549~odorant binding,  
 GO:0004672~protein kinase activity,GO:0004674~protein serine/threonine kinase activity,GO:0005515~protein binding,GO:0000287~magnesium ion binding,GO:0004614~phosphoglucosyltransferase activity,GO:0004615~phosphoglucomutase activity,GO:0004044~amidophosphoribosyltransferase activity,GO:0046872~metal ion binding,GO:0051536~iron ion binding,GO:0008157~protein phosphatase 1 binding,  
 GO:0005509~calcium ion binding,GO:0005525~GTP binding,  
 GO:0043130~ubiquitin binding,  
 GO:0005515~protein binding,  
 GO:0005524~ATP binding,GO:0016787~hydrolase activity,GO:0016887~ATPase activity,GO:0017025~receptor binding,GO:0005102~receptor binding,GO:0005319~lipid transporter activity,GO:0005504~fatty acid binding,GO:0005089~Rho guanyl-nucleotide exchange factor activity,

GO:0004672~protein kinase activity,GO:0005524~ATP binding,

GO:0008233~peptidase activity,  
 GO:0004177~aminopeptidase activity,GO:0008235~metalloexopeptidase activity,GO:0030145~manganese ion binding,GO:0004177~aminopeptidase activity,GO:0008235~metalloexopeptidase activity,GO:0030145~manganese ion binding,GO:0004177~aminopeptidase activity,GO:0008235~metalloexopeptidase activity,GO:0030145~manganese ion binding,GO:0004177~aminopeptidase activity,GO:0008235~metalloexopeptidase activity,GO:0030145~manganese ion binding,GO:0004177~aminopeptidase activity,GO:0008235~metalloexopeptidase activity,GO:0030145~manganese ion binding,  
 GO:0004860~protein kinase inhibitor activity,  
 GO:0046982~protein heterodimerization activity,  
 GO:0004842~ubiquitin-protein transferase activity,GO:0005515~protein binding,GO:0008270~zinc ion binding,GO:0004866~endopeptidase inhibitor activity,  
 GO:0008566~mitochondrial protein-transporting ATPase activity,GO:0015450~P-P-bond-hydrolysis-driven protein transmembrane transporter activity,  
 GO:0015450~P-P-bond-hydrolysis-driven protein transmembrane transporter activity,  
 GO:0004839~ubiquitin activating enzyme activity,GO:0004842~ubiquitin-protein transferase activity,GO:0004843~thiol-dependent ubiquitin-specific protease activity,  
 GO:0003677~DNA binding,GO:0003723~RNA binding,GO:0004844~uracil DNA N-glycosylase activity,G



GO:0052689~carboxylic ester hydrolase activity,  
GO:0005089~Rho guanyl-nucleotide exchange factor activity,  
GO:0004872~receptor activity,GO:0042043~neurexin family protein binding,GO:0052689~carboxylic est

GO:0005524~ATP binding,  
GO:0003924~GTPase activity,GO:0005200~structural constituent of cytoskeleton,GO:0005525~GTP bir  
GO:0003682~chromatin binding,GO:0004842~ubiquitin-protein transferase activity,GO:0008270~zinc ion  
GO:0004888~transmembrane signaling receptor activity,GO:0004930~G-protein coupled receptor activit  
GO:0004842~ubiquitin-protein transferase activity,GO:0008270~zinc ion binding,GO:0016874~ligase act  
GO:0003779~actin binding,GO:0005515~protein binding,GO:0005546~phosphatidylinositol-4,5-bisphosph

agellum,

GO:0005515~protein binding,  
GO:0000340~RNA 7-methylguanosine cap binding,GO:0003743~translation initiation factor activity,  
GO:0005086~ARF guanyl-nucleotide exchange factor activity,  
GO:0000166~nucleotide binding,GO:0003723~RNA binding,GO:0005515~protein binding,  
GO:0005125~cytokine activity,GO:0005160~transforming growth factor beta receptor binding,GO:00080  
GO:0000166~nucleotide binding,GO:0000900~translation repressor activity, nucleic acid binding,GO:000  
GO:0003723~RNA binding,GO:0004842~ubiquitin-protein transferase activity,GO:0008270~zinc ion binc  
GO:0004108~citrate (Si)-synthase activity,GO:0046912~transferase activity, transferring acyl groups, ac  
GO:0003677~DNA binding,GO:0003688~DNA replication origin binding,  
GO:0005524~ATP binding,GO:0008569~ATP-dependent microtubule motor activity, minus-end-directed,  
GO:0050839~cell adhesion molecule binding,  
GO:0004842~ubiquitin-protein transferase activity,GO:0008270~zinc ion binding,GO:0032033~myosin II  
GO:0004366~glycerol-3-phosphate O-acyltransferase activity,  
GO:0003677~DNA binding,GO:0005515~protein binding,  
GO:0005216~ion channel activity,GO:0005261~cation channel activity,  
GO:0000166~nucleotide binding,GO:0000976~transcription regulatory region sequence-specific DNA bir  
GO:0004842~ubiquitin-protein transferase activity,  
GO:0008969~phosphohistidine phosphatase activity,

GO:0003677~DNA binding,GO:0031208~POZ domain binding,GO:0042803~protein homodimerization a  
GO:0003682~chromatin binding,  
GO:0005515~protein binding,  
GO:0003779~actin binding,GO:0005509~calcium ion binding,GO:0005515~protein binding,GO:0008017  
GO:0005524~ATP binding,  
microtubule associated complex,  
GO:0003677~DNA binding,GO:0003779~actin binding,GO:0004721~phosphoprotein phosphatase activi

GO:0004198~calcium-dependent cysteine-type endopeptidase activity,GO:0008270~zinc ion binding,  
GO:0000166~nucleotide binding,GO:0003723~RNA binding,GO:0003729~mRNA binding,  
GO:0005515~protein binding,  
GO:0005057~receptor signaling protein activity,GO:0005089~Rho guanyl-nucleotide exchange factor ac  
GO:005819~spindle,GO:0005938~cell cortex,GO:0030496~midbody,GO:0031965~nuclear membrane,



03676~nucleic acid binding,GO:0003723~RNA binding,GO:0003729~mRNA binding,GO:0003730~mRNA binding

nosyltransferase activity,GO:0046872~metal ion binding,GO:0050508~glucuronosyl-N-acetylglucosaminyl

leosome binding,GO:0035035~histone acetyltransferase binding,GO:0042054~histone methyltransferas

:0003707~steroid hormone receptor activity,GO:0004879~RNA polymerase II transcription factor activity

3709~oxidoreductase activity, acting on paired donors, with incorporation or reduction of molecular oxygen

serotonin receptor activity,GO:0004989~octopamine receptor activity,GO:0004993~G-protein coupled serotonin





A 3'-UTR binding,GO:0008135~translation factor activity, RNA binding,GO:0008494~translation



/l-proteoglycan 4-alpha-N-acetylglucosaminyltransferase activity,GO:0050509~N-acetylglucosar

e activity,GO:0042393~histone binding,GO:0042803~protein homodimerization activity,GO:004

', ligand-activated sequence-specific DNA binding,GO:0004887~thyroid hormone receptor activi

n, NAD(P)H as one donor, and incorporation of one atom of oxygen,GO:0043914~NADPH:sulf

receptor activity,GO:0008227~G-protein coupled amine receptor activity,GO:0043565~sequenc







2826~histone deacetylase binding,GO:0046974~histone methyltransferase activity (H3-K9 spec

ity,GO:0008270~zinc ion binding,GO:0020037~heme binding,GO:0043565~sequence-specific [











specific),GO:0046976~histone methyltransferase activity (H3-K27 specific),GO:0070615~nucleosor









ne-dependent ATPase activity,
